# Supplementary material for: Synthesis and studies of aqueous-stable diruthenium aminocarbyne complexes uncovered an N-indolyl derivative as a prospective anticancer agent
Source: Royal Society of Chemistry journal article supplement (doi:10.1039/d4qi00096j), 2024-01-01
Supplement: d4qi00096j1.pdf [file d4qi00096j1.pdf]

# Synthesis and Studies of Aqueous-Stable Diruthenium Aminocarbyne Complexes Uncovered an N-Indolyl Derivative as Prospective Anticancer Agent

Matteo Fiaschi,<sup>a</sup> Ján Vančo,<sup>b</sup> Lorenzo Biancalana,<sup>a,\*</sup> Tomáš Malina,<sup>b</sup> Zdeněk Dvořák,<sup>c</sup> Tiziana Funaioli,<sup>a</sup>  
Stefano Zacchini,<sup>d</sup> Massimo Guelfi,<sup>a</sup> Zdeněk Trávníček,<sup>b,\*</sup> and Fabio Marchetti<sup>a,\*</sup>

<sup>a</sup> University of Pisa, Department of Chemistry and Industrial Chemistry, Via G. Moruzzi 13, I-56124 Pisa, Italy.

<sup>b</sup> Regional Centre of Advanced Technologies and Materials, Czech Advanced Technology and Research Institute,  
Palacký University, Šlechtitelů 27, CZ-779 00 Olomouc, Czech Republic.

<sup>c</sup> Department of Cell Biology and Genetics, Faculty of Science, Palacký University, Šlechtitelů 27, CZ-779 00  
Olomouc, Czech Republic.

<sup>d</sup> University of Bologna, Department of Industrial Chemistry "Toso Montanari", Viale del Risorgimento 4, I-40136  
Bologna, Italy.

## Supporting Information

| Table of contents                                                                                                             | Page(s) |
|-------------------------------------------------------------------------------------------------------------------------------|---------|
| Synthesis and characterization of 1 <i>H</i> -indol-5-yl isocyanide                                                           | S2-S3   |
| Recovery of unreacted [Ru <sub>2</sub> Cp <sub>2</sub> (CO) <sub>4</sub> ]                                                    | S4      |
| IR characterization of [Ru <sub>2</sub> Cp <sub>2</sub> (CO) <sub>3</sub> (CNR)] ( <b>Figures S1-S2</b> )                     | S5-S6   |
| IR and NMR characterization of tricarbonyl aminocarbyne complexes<br>( <b>Figures S3-S25, Tables S1-S2</b> )                  | S7-S19  |
| Synthesis and characterization of [ <b>3a</b> ]CF <sub>3</sub> SO <sub>3</sub> ( <b>Chart S1, Figure S26</b> )                | S21-22  |
| Log <i>P</i> <sub>ow</sub> , solubility and stability studies in aqueous media ( <b>Figures S27-S30,</b><br><b>Table S3</b> ) | S23-S26 |
| Cyclic voltammograms in CH <sub>2</sub> Cl <sub>2</sub> solution ( <b>Figures S31-S32</b> )                                   | S27     |
| X-ray crystallography ( <b>Tables S4-S5</b> )                                                                                 | S28-S29 |
| Mass spectrometry stability studies ( <b>Figures S33-S35</b> )                                                                | S30-S32 |
| References                                                                                                                    | S33     |

### Synthesis and characterization of 1*H*-indol-5-yl isocyanide (5-isocyano-1*H*-indole)

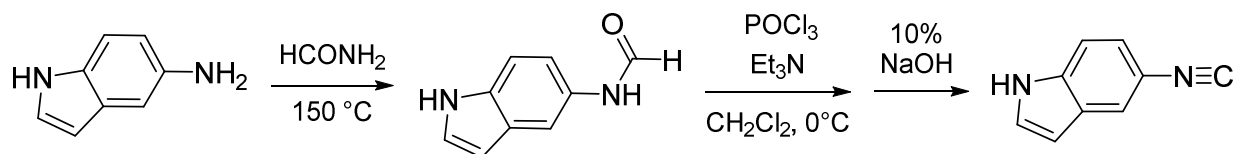

**Scheme S1.** Two-step synthesis of 1*H*-indol-5-yl isocyanide from 5-aminoindole.

The procedures reported below were modified with respect to the literature.<sup>1,2</sup>

***N*-(1*H*-indol-5-yl)formamide.**<sup>1</sup> A suspension of 5-aminoindole (1.245 g, 9.19 mmol) and formamide (6.2 mL, 156 mmol) was stirred at 150 °C overnight in a 10 mL Schlenk tube under N<sub>2</sub>. The resulting dark red mixture was treated with water, ethyl acetate (*ca.* 20 mL each) and moved into a separatory funnel. The red-brown aqueous phase was discarded and the organic phase was extracted with water (x 2). Next, the organic phase was spiked with silica gel and volatiles were removed under vacuum. The solid was moved on top of a silica gel column (h 6.5 cm, d 4.3 cm). Impurities were eluted with CH<sub>2</sub>Cl<sub>2</sub>/acetone 4:1 *V/V* then a yellow band was eluted with CH<sub>2</sub>Cl<sub>2</sub>/acetone 2:1 *V/V* and taken to dryness under vacuum. The oily residue was treated with few mL of CH<sub>2</sub>Cl<sub>2</sub> and taken to dryness again. The resulting faint yellow-pink (almost colorless) solid was dried under vacuum for several hours then moved into a 50-mL round bottom flask for the next step. Yield: 998 mg, 67.8 %.

Colorless solid. Soluble in acetone, poorly soluble in CH<sub>2</sub>Cl<sub>2</sub>, CHCl<sub>3</sub>. <sup>1</sup>H NMR (acetone-d<sub>6</sub>): δ/ppm = 10.28, 10.20 (s-br, 1H); 9.05, 8.96 (s-br, 1H); 8.63 (d, *J* = 11.3 Hz), 8.34 (d, *J* = 1.6 Hz) (1H); 8.02 (s), 7.00 (dd, *J* = 8.7, 1.9 Hz) (1H); 7.45–7.28 (m, 3H), 6.49–6.41 (m, 1H). <sup>13</sup>C{<sup>1</sup>H} NMR (acetone-d<sub>6</sub>): δ/ppm = 163.3, 159.4; 134.2; 131.7; 129.0; 127.0, 126.5; 115.8, 115.6; 112.9, 112.0; 111.9, 111.5; 102.4, 102.3.

**1*H*-indol-5-yl isocyanide, IndNC.**<sup>2</sup> A suspension of *N*-(1*H*-indol-5-yl)formamide (998 mg, 6.23 mmol) and Et<sub>3</sub>N (1.70 mL, 12.2 mmol) in anhydrous CH<sub>2</sub>Cl<sub>2</sub> (15 mL) under nitrogen was cooled to 0

°C. POCl<sub>3</sub> (0.70 mL, 7.07 mmol) was added dropwise to the mixture under vigorous stirring at 0 °C. The resulting pale ochre-yellow solution was stirred for 2 h and allowed to slowly warm to room temperature. Next, the mixture was cooled to 0 °C and treated with a cold 10 % NaOH aqueous solution under vigorous stirring. The mixture was diluted with CH<sub>2</sub>Cl<sub>2</sub>, and the water phase was then moved into a separatory funnel. The aqueous phase was extracted with CH<sub>2</sub>Cl<sub>2</sub> (3x) and the combined organic fractions were taken to dryness under vacuum. The residue was dissolved in a small volume of CH<sub>2</sub>Cl<sub>2</sub> and filtered over celite. The filtrate was taken to dryness under vacuum and the residue was triturated in pentane (10 mL). The suspension was filtered and the resulting colorless (faint beige) solid was dried under vacuum (RT) and stored under N<sub>2</sub>. Yield: 652 mg, 73.7 % (50 % overall yield from 5-aminoindole).

Colorless solid. Soluble in MeCN, CH<sub>2</sub>Cl<sub>2</sub>, poorly soluble in hexane, pentane. IR (CH<sub>2</sub>Cl<sub>2</sub>):  $\tilde{\nu}/\text{cm}^{-1}$  = 2155w, 2127s (C≡N), 1607w-br, 1474m, 1457m, 1420m, 1347w, 1324m. IR (MeCN):  $\tilde{\nu}/\text{cm}^{-1}$  = 2126s (C≡N). <sup>1</sup>H NMR (CDCl<sub>3</sub>):  $\delta/\text{ppm}$  = 8.39 (s-br, 1H, NH); 7.69 (s, 1H); 7.37 (d, *J* = 8.6 Hz, 1H); 7.31 (t, *J* = 2.8 Hz, 1H); 7.20 (d, *J* = 8.5 Hz, 1H); 6.60–6.57 (m, 1H). <sup>13</sup>C{<sup>1</sup>H} NMR (CDCl<sub>3</sub>):  $\delta/\text{ppm}$  = 160.9 (CN); 135.3; 127.7; 126.6; 120.4; 119.3; 111.8; 103.3.

### Recovery of unreacted $[\text{Ru}_2\text{Cp}_2(\text{CO})_4]$

During the chromatographic purification of  $[\mathbf{2a-g}]\text{CF}_3\text{SO}_3$ , yellow bands containing unreacted  $[\text{Ru}_2\text{Cp}_2(\text{CO})_4]$  were eluted with  $\text{CH}_2\text{Cl}_2$  and taken to dryness under vacuum. The following operations were carried out under  $\text{N}_2$  using deaerated solvents (solutions of  $[\text{Ru}_2\text{Cp}_2(\text{CO})_4]$  in  $\text{CH}_2\text{Cl}_2$  slowly darkens when exposed to air).<sup>3</sup> The yellow-brown residue was suspended in hexane and moved on top of an alumina column. Impurities were eluted with hexane and hexane/ $\text{Et}_2\text{O}$  1:1 *V/V*, then a yellow band was eluted with  $\text{CH}_2\text{Cl}_2$ . Volatiles were removed under vacuum, affording a yellow solid which was further dried under vacuum at 40 °C and stored under  $\text{N}_2$ .

## IR characterization of $[\text{Ru}_2\text{Cp}_2(\text{CO})_3(\text{CNR})]$

**Figure S1.** Comparative view of IR spectra ( $1600\text{--}2200\text{ cm}^{-1}$ ) of  $[\text{Ru}_2\text{Cp}_2(\text{CO})_4]$  (black line) and of the final reaction mixtures of  $[\text{Ru}_2\text{Cp}_2(\text{CO})_4]$  and MeNC (blue line), CyNC (red line), XylNC (dark green line; reaction time: 6 h) or IndNC (cyan line) in MeCN. Spectra are solvent-subtracted and normalized with respect to the transmittance of the bridging carbonyl stretching peak of  $[\text{Ru}_2\text{Cp}_2(\text{CO})_4]$  ( $1774\text{ cm}^{-1}$ ).

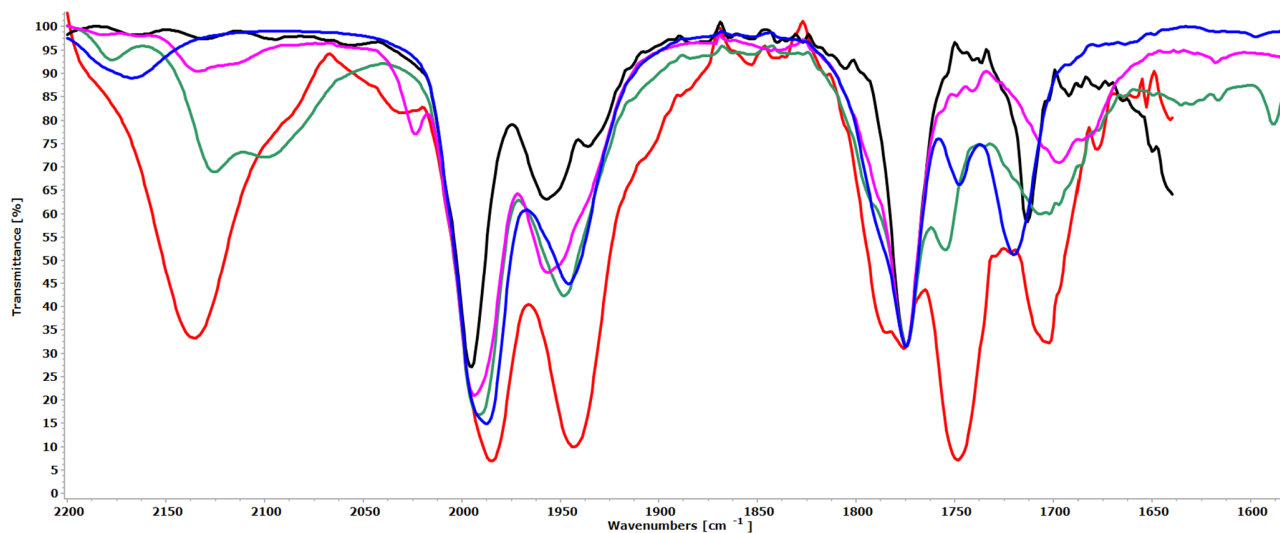

**Figure S2.** Comparative view of IR spectra ( $1600\text{--}2200\text{ cm}^{-1}$ ) of  $[\text{Ru}_2\text{Cp}_2(\text{CO})_4]$  (black line) and of the final reaction mixtures of  $[\text{Ru}_2\text{Cp}_2(\text{CO})_4]$  and (2-naphthyl)NC (blue line), BnNC (red line), (S-PhCHMe)NC (dark green line) or (4-C<sub>6</sub>H<sub>4</sub>OMe)NC (cyan line) in THF. Spectra are solvent-subtracted and normalized with respect to the transmittance of the bridging carbonyl stretching peak of  $[\text{Ru}_2\text{Cp}_2(\text{CO})_4]$  ( $1782\text{ cm}^{-1}$ ).

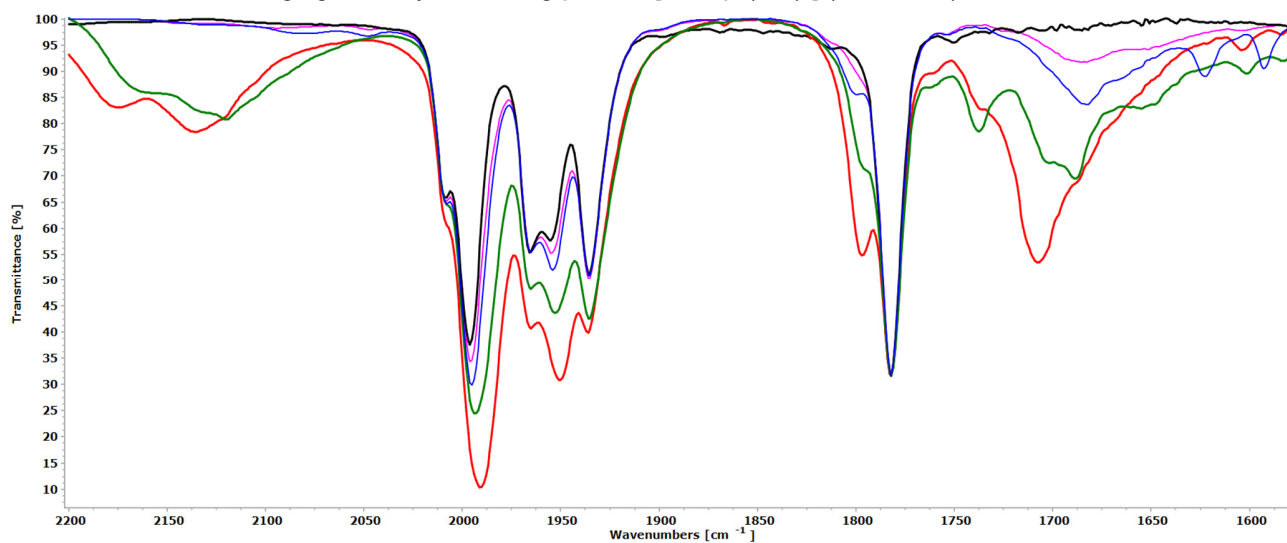

**IR data for [Ru<sub>2</sub>Cp<sub>2</sub>(CO)<sub>3</sub>(CNR)], 1a-h.** Data refer to IR spectra of the reaction mixtures. Signals corresponding (or covered by) [Ru<sub>2</sub>Cp<sub>2</sub>(CO)<sub>4</sub>] absorptions are marked with an asterisk (\*). Terminal/bridging coordination is indicated as t/μ, respectively.

**[Ru<sub>2</sub>Cp<sub>2</sub>(CO)<sub>3</sub>(CNMe)], 1a.** IR (MeCN):  $\tilde{\nu}/\text{cm}^{-1} = 2068\text{w}$  (t-CN), 1988s (t-CO), 1946s (t-CO), 1787s-sh (μ-CO), 1775s\* (μ-CO), 1748m (μ-CO), 1720m (μ-CN).

**[Ru<sub>2</sub>Cp<sub>2</sub>(CO)<sub>3</sub>(CNCy)], 1b.** IR (MeCN):  $\tilde{\nu}/\text{cm}^{-1} = 2136\text{m}$  (t-CN), 1985s (t-CO), 1943s (t-CO), 1786m (μ-CO), 1776m\* (μ-CO), 1704m (μ-CN). IR (toluene):  $\tilde{\nu}/\text{cm}^{-1} = 2133\text{m}$  (t-CN), 1995s (t-CO), 1965s\* (t-CO), 1951s (t-CO), 1936s-sh\* (t-CO), 1780s\* (μ-CO), 1756s (μ-CO), 1706m (μ-CN).

**[Ru<sub>2</sub>Cp<sub>2</sub>(CO)<sub>3</sub>(CNXyl)], 1c.** IR (MeCN):  $\tilde{\nu}/\text{cm}^{-1} = 2127\text{w}$  (t-CN), 1991s\* (t-CO), 1948m (t-CO), 1793w-sh (μ-CO), 1774m\* (μ-CO), 1755m\* (μ-CO), 1706w-br (μ-CN).

**[Ru<sub>2</sub>Cp<sub>2</sub>(CO)<sub>3</sub>{CN(1*H*-indol-5-yl)}], 1d.** IR (MeCN)  $\tilde{\nu}/\text{cm}^{-1} = 2135\text{w}$  (t-CN ?), 1993s\* (t-CO), 1790w-sh (μ-CO), 1775s (μ-CO), 1697m-br (μ-CN).

**[Ru<sub>2</sub>Cp<sub>2</sub>(CO)<sub>3</sub>{CN(2-naphthyl)}], 1e.** IR (THF):  $\tilde{\nu}/\text{cm}^{-1} = 2130\text{vw}$  (t-CN ?), 1800m (μ-CO), 1683m (μ-CN). Other absorptions are covered by [Ru<sub>2</sub>Cp<sub>2</sub>(CO)<sub>4</sub>].

**[Ru<sub>2</sub>Cp<sub>2</sub>(CO)<sub>3</sub>{CN(4-C<sub>6</sub>H<sub>4</sub>OMe)}], 1f.** IR (THF):  $\tilde{\nu}/\text{cm}^{-1} = 2142\text{vw}$  (t-CN ?), 1686w (μ-CN). Other absorptions are covered by [Ru<sub>2</sub>Cp<sub>2</sub>(CO)<sub>4</sub>].

**[Ru<sub>2</sub>Cp<sub>2</sub>(CO)<sub>3</sub>(CNBn)], 1g.** IR (THF):  $\tilde{\nu}/\text{cm}^{-1} = 2131\text{w-br}$  (t-CN), 1991s (t-CO), 1950s (t-CO), 1797m (μ-CO), 1707m-br (μ-CN).

## IR and NMR characterization of $[\text{Ru}_2\text{Cp}_2(\text{CO})_2(\mu\text{-CO})\{\mu\text{-CNMe}(\text{R})\}]\text{CF}_3\text{SO}_3$

**Figure S3.** Solid-state IR spectrum ( $650\text{-}4000\text{ cm}^{-1}$ ) of  $[\text{Ru}_2\text{Cp}_2(\text{CO})_2(\mu\text{-CO})\{\mu\text{-CNMe}_2\}]\text{CF}_3\text{SO}_3$ ,  $[\mathbf{2a}]\text{CF}_3\text{SO}_3$ .

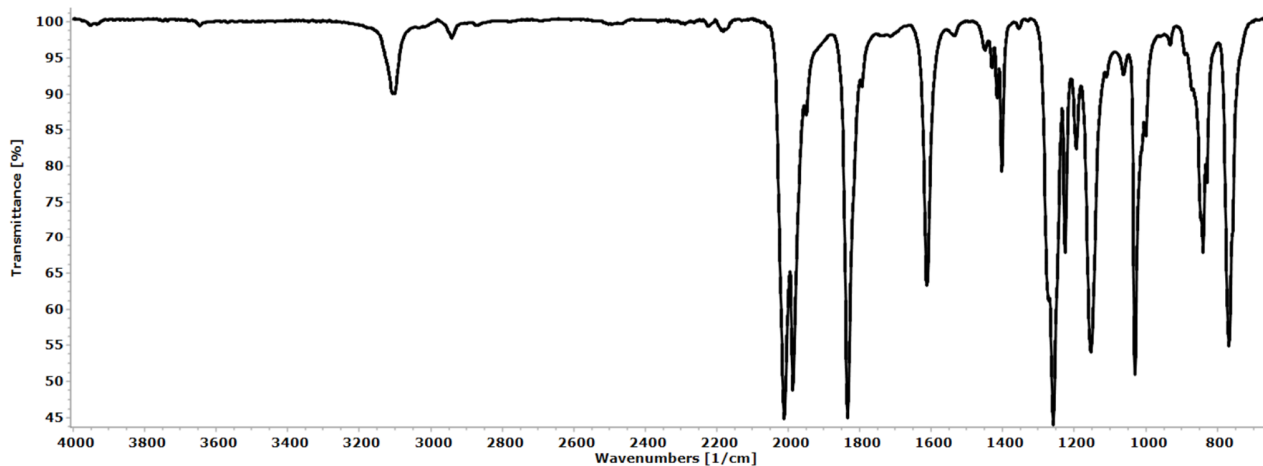

**Figure S4.** Comparison of IR spectra in  $\text{CH}_2\text{Cl}_2$  ( $1500\text{-}2300\text{ cm}^{-1}$ ) of  $[\mathbf{2a}]\text{CF}_3\text{SO}_3$  (blue line) and the diiron homologue  $[\mathbf{2a}^{\text{Fe}}]\text{CF}_3\text{SO}_3$  (red line). Transmittance of bridging carbonyl stretching peak (ca.  $1840\text{ cm}^{-1}$ ) is normalized.

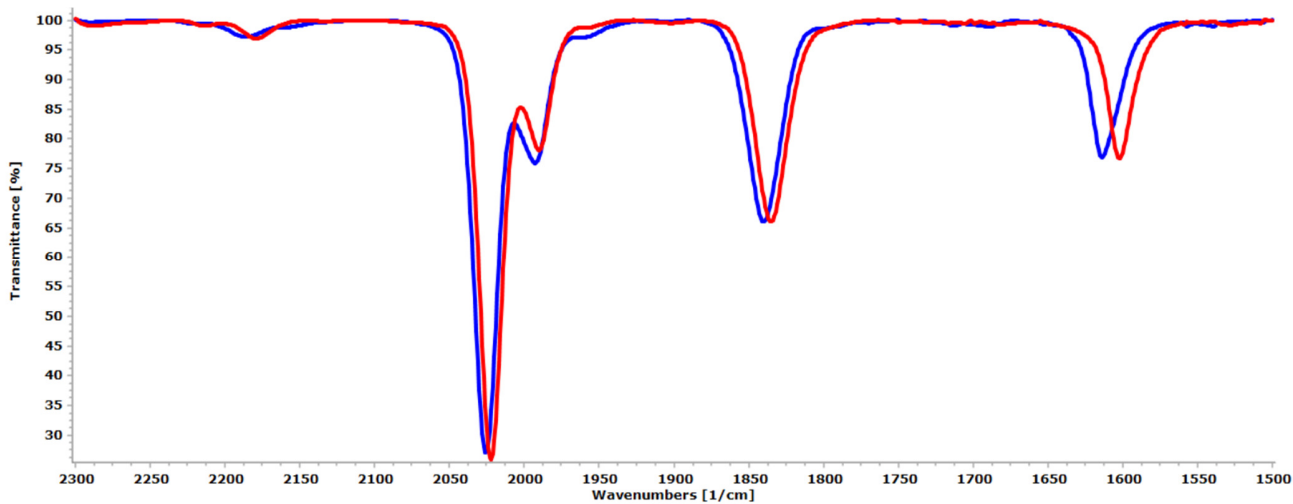

**Figure S5.** Solid-state IR spectrum (650-4000  $\text{cm}^{-1}$ ) of  $[\text{Ru}_2\text{Cp}_2(\text{CO})_2(\mu\text{-CO})\{\mu\text{-CNMe}(\text{Cy})\}]\text{CF}_3\text{SO}_3$ , **[2b]** $\text{CF}_3\text{SO}_3$ .

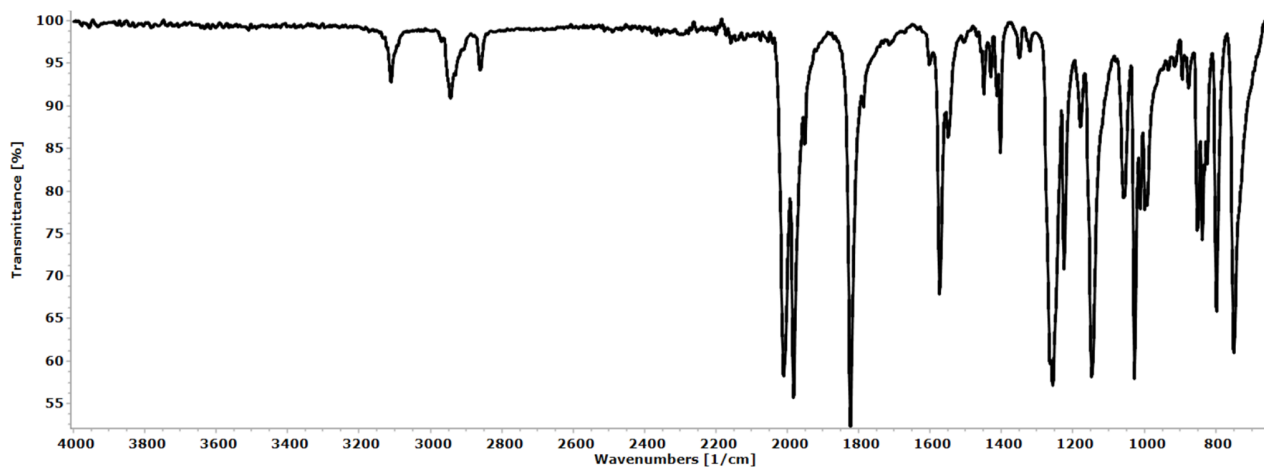

**Figure S6.** Comparison of IR spectra in  $\text{CH}_2\text{Cl}_2$  (1500-2300  $\text{cm}^{-1}$ ) of **[2b]** $\text{CF}_3\text{SO}_3$  (blue line) and the diiron homologue **[2b<sup>Fe</sup>]** $\text{CF}_3\text{SO}_3$  (red line). Transmittance of bridging carbonyl stretching peak (ca. 1840  $\text{cm}^{-1}$ ) is normalized.

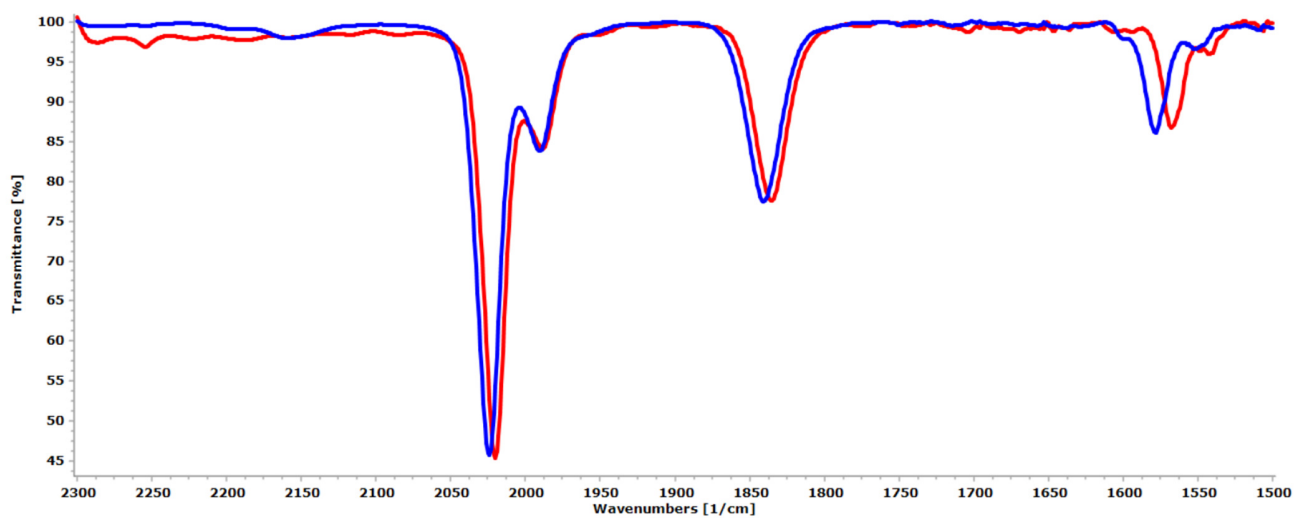



**Figure S7.** Solid-state IR spectrum (650-4000  $\text{cm}^{-1}$ ) of  $[\text{Ru}_2\text{Cp}_2(\text{CO})_2(\mu\text{-CO})\{\mu\text{-CNMe(Xyl)}\}]\text{CF}_3\text{SO}_3$ , **[2c]** $\text{CF}_3\text{SO}_3$ .

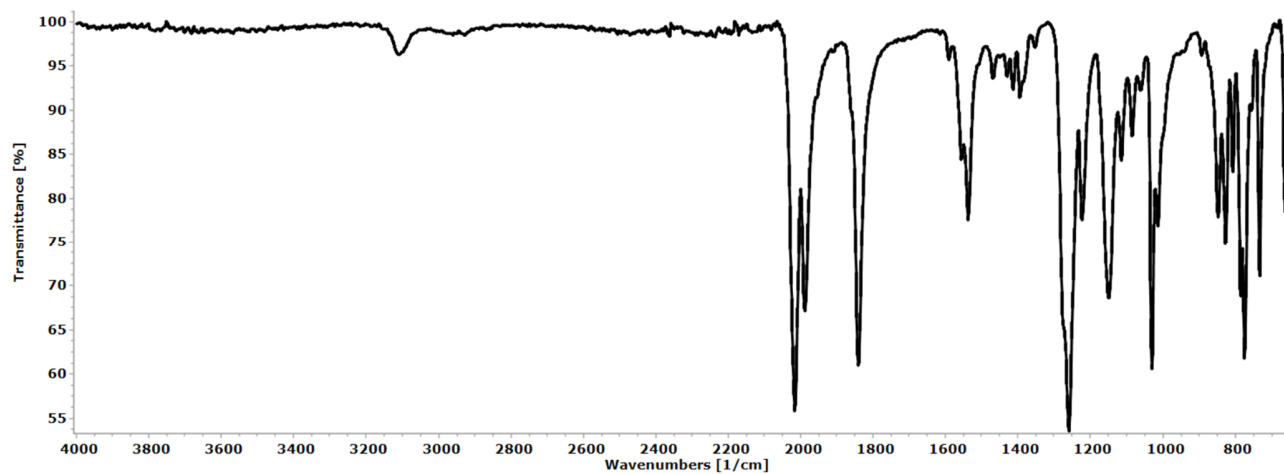

**Figure S8.** Comparison of IR spectra in  $\text{CH}_2\text{Cl}_2$  (1500-2300  $\text{cm}^{-1}$ ) of **[2c]** $\text{CF}_3\text{SO}_3$  (blue line) and the diiron homologue **[2c<sup>Fe</sup>]** $\text{CF}_3\text{SO}_3$  (red line). Transmittance of bridging carbonyl stretching peak (ca. 1840  $\text{cm}^{-1}$ ) is normalized.

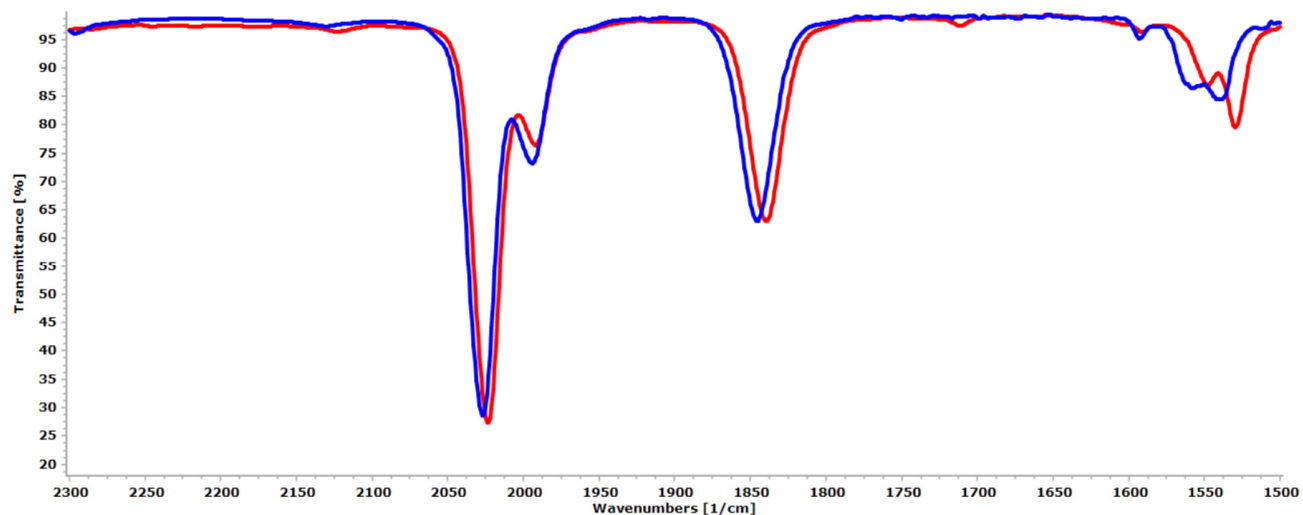

**Figure S9.** Solid-state IR spectrum (650-4000  $\text{cm}^{-1}$ ) of  $[\text{Ru}_2\text{Cp}_2(\text{CO})_2(\mu\text{-CO})\{\mu\text{-CNMe}(1H\text{-indol-5-yl})\}]\text{CF}_3\text{SO}_3$ ,  $[\mathbf{2d}]\text{CF}_3\text{SO}_3$ .

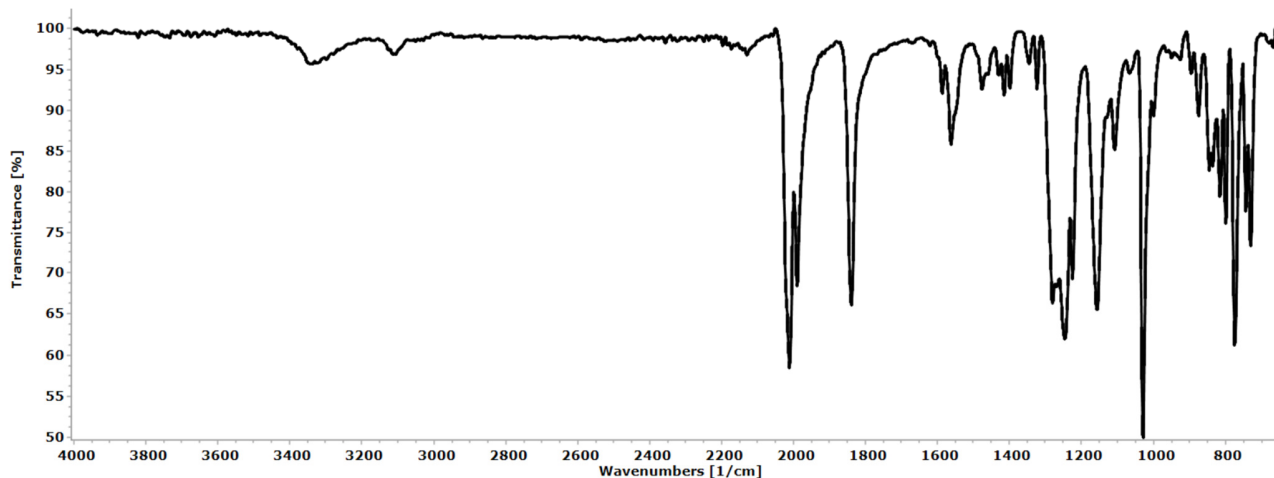

**Figure S10.** Comparison of IR spectra in  $\text{CH}_2\text{Cl}_2$  (1500-2300  $\text{cm}^{-1}$ ) of  $[\mathbf{2d}]\text{CF}_3\text{SO}_3$  (blue line) and the diiron homologue  $[\mathbf{2d}^{\text{Fe}}]\text{CF}_3\text{SO}_3$  (red line). Transmittance of bridging carbonyl stretching peak (ca. 1840  $\text{cm}^{-1}$ ) is normalized.

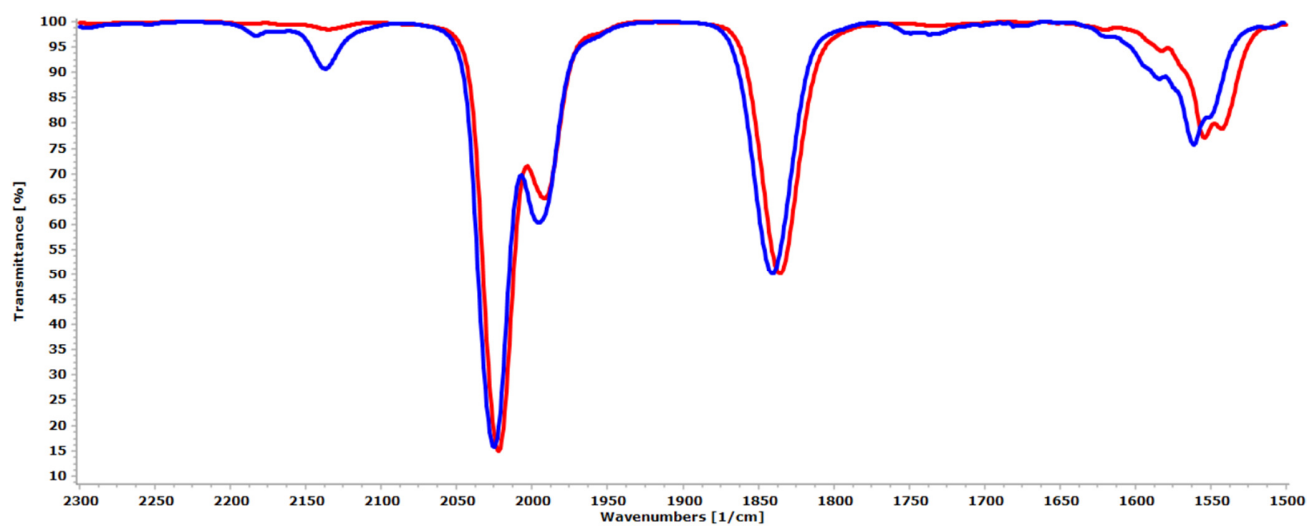

**Figure S11.** Comparison of IR spectra in CH<sub>2</sub>Cl<sub>2</sub> (1500-2300 cm<sup>-1</sup>) of [Ru<sub>2</sub>Cp<sub>2</sub>(CO)<sub>2</sub>(μ-CO){μ-CNMe(2-naphthyl)}]CF<sub>3</sub>SO<sub>3</sub>, **[2e]**CF<sub>3</sub>SO<sub>3</sub> (blue line) and the diiron homologue **[2e<sup>Fe</sup>]**CF<sub>3</sub>SO<sub>3</sub> (red line). Transmittance of bridging carbonyl stretching peak (ca. 1840 cm<sup>-1</sup>) is normalized.

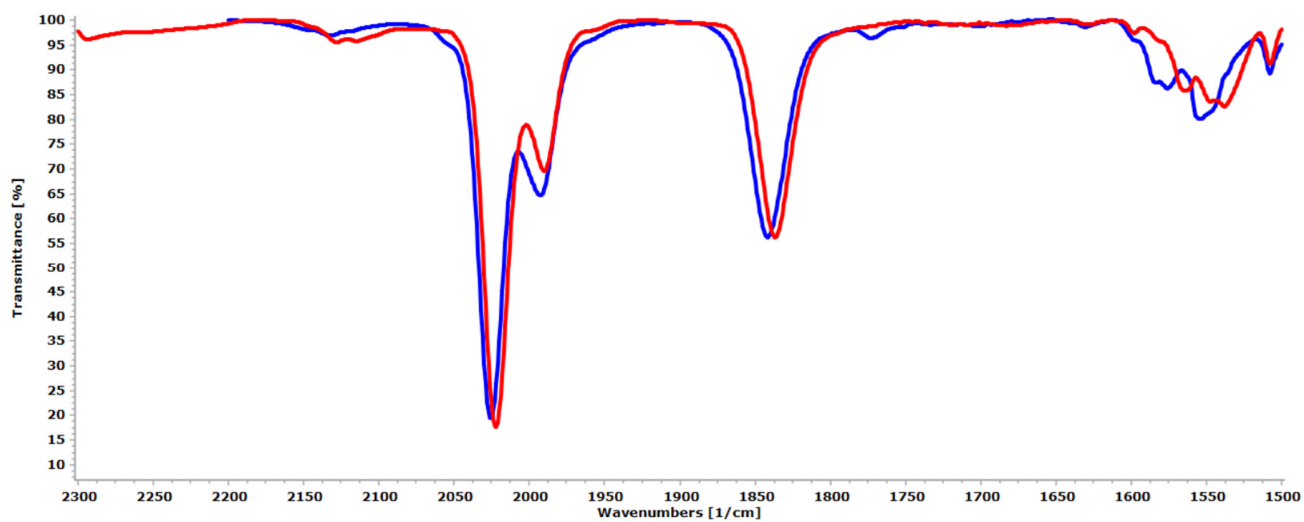

**Figure S12.**  $^1\text{H}$  NMR spectrum (401 MHz, acetone- $d_6$ ) of  $[\text{Ru}_2\text{Cp}_2(\text{CO})_2(\mu\text{-CO})\{\mu\text{-CNMe}_2\}]\text{CF}_3\text{SO}_3$ , **[2a]** $\text{CF}_3\text{SO}_3$ . The integration is related to the signals of the major (*cis*) + minor (*trans*) isomers.

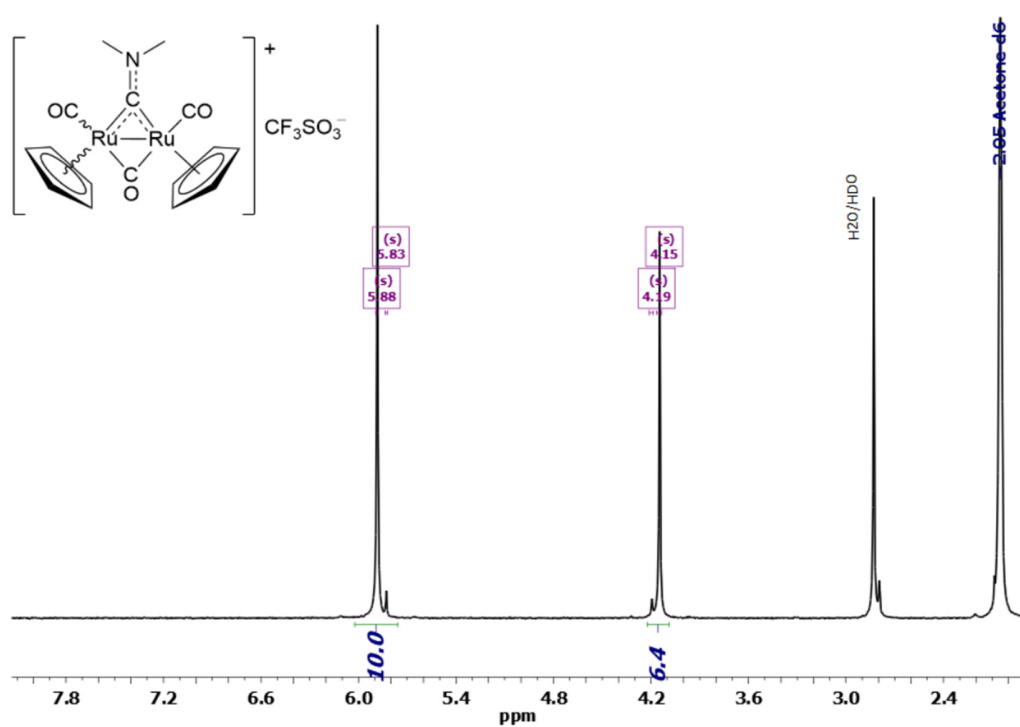

**Figure S13.**  $^{13}\text{C}\{^1\text{H}\}$  NMR spectrum (101 MHz, acetone- $d_6$ ) of **[2a]** $\text{CF}_3\text{SO}_3$ .

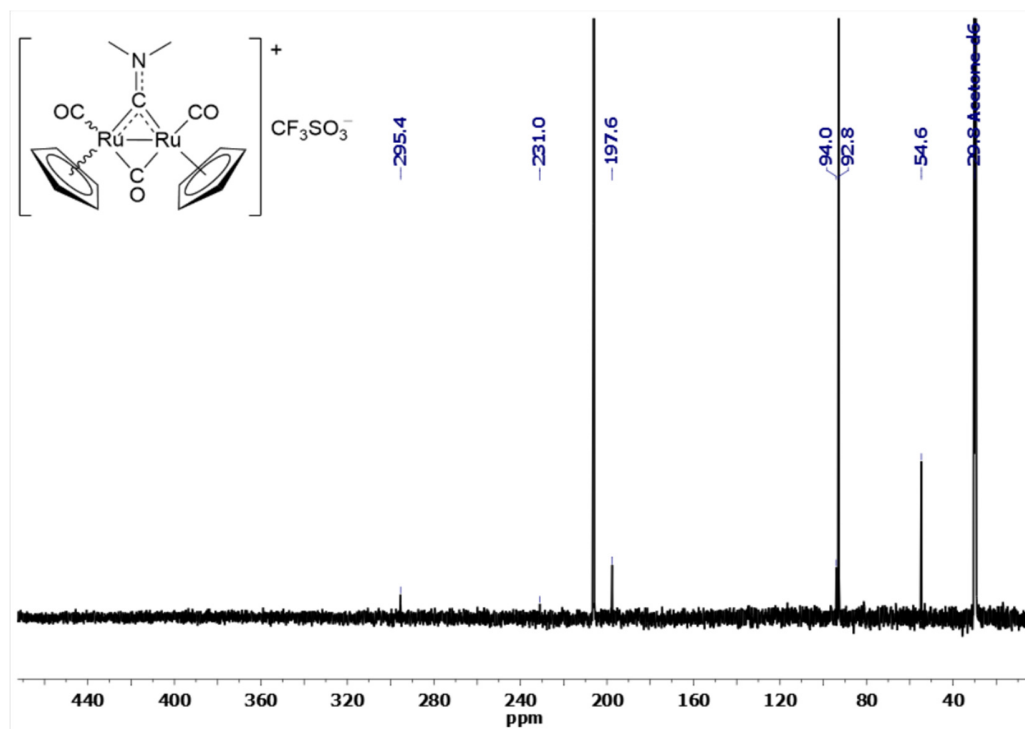

**Figure S14.**  $^1\text{H}$  NMR spectrum (401 MHz,  $\text{CDCl}_3$ ) of  $[\text{Ru}_2\text{Cp}_2(\text{CO})_2(\mu\text{-CO})\{\mu\text{-CNMe(Cy)}\}]\text{CF}_3\text{SO}_3$ , **[2b]** $\text{CF}_3\text{SO}_3$ . The integration is related to the signals of the major (*cis*) + minor (*trans*) isomers.

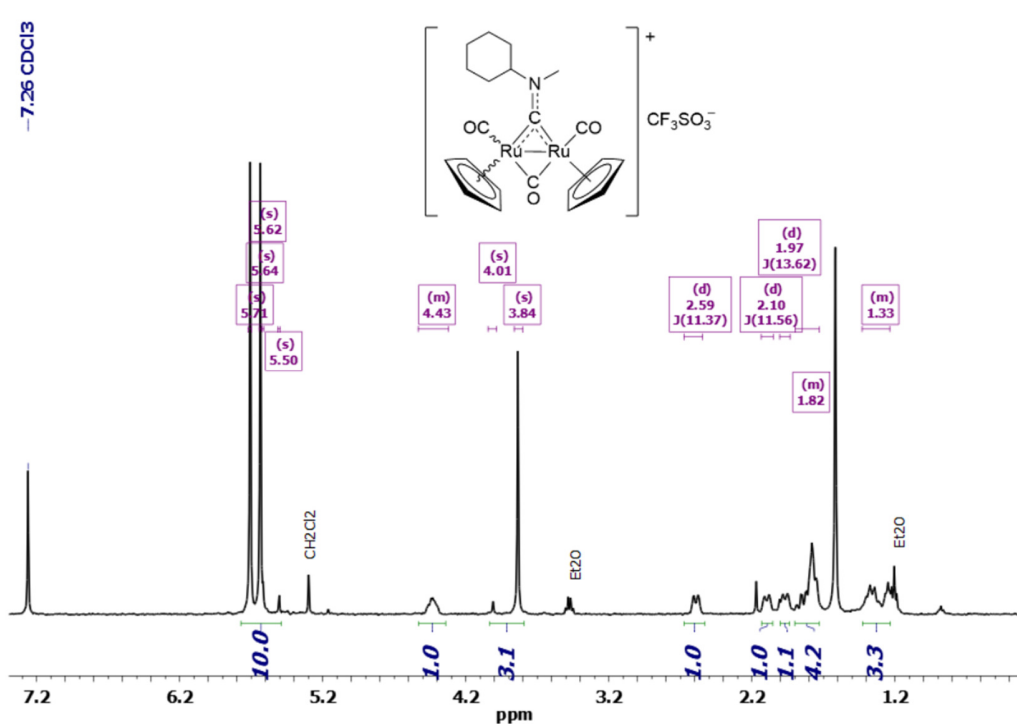

**Figure S15.**  $^{13}\text{C}\{^1\text{H}\}$  NMR spectrum (101 MHz,  $\text{CDCl}_3$ ) of **[2b]** $\text{CF}_3\text{SO}_3$ .

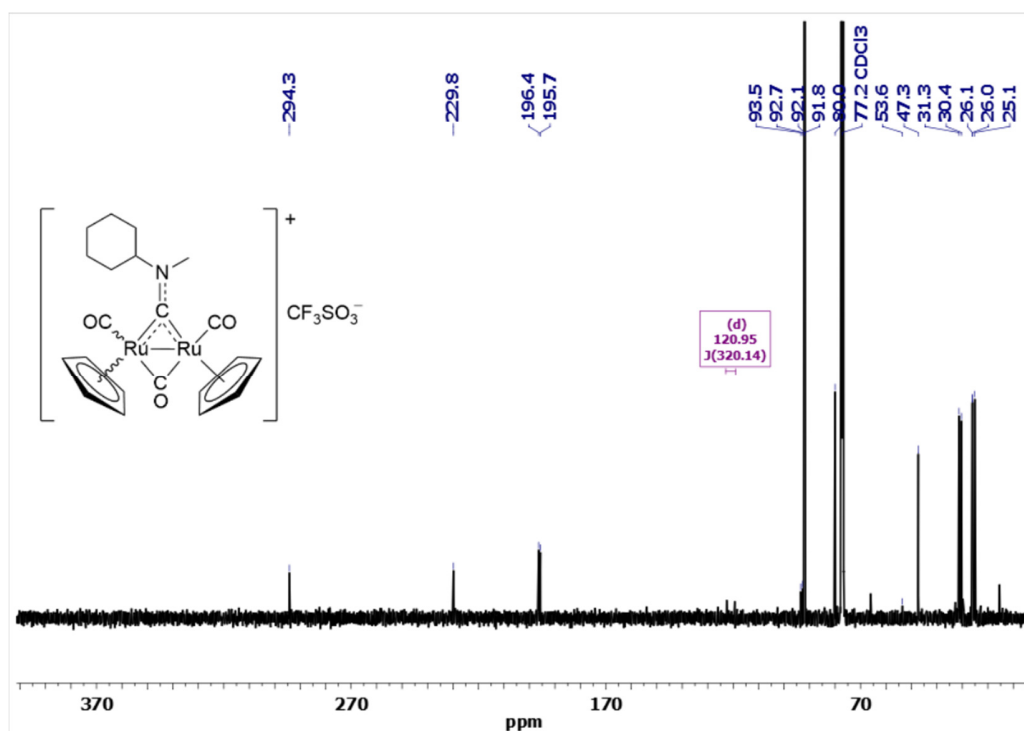

**Figure S16.** Black line:  $^1\text{H}$  NMR spectrum (401 MHz, acetone- $d_6$ ) of *cis*-[2b] $\text{CF}_3\text{SO}_3$ . Blue line:  $^1\text{H}$  NOESY with irradiation at 5.71 ppm (Cp). Red line:  $^1\text{H}$  NOESY with irradiation at 5.64 ppm (Cp'). Observed NOEs are indicated by the arrows. The NOE effect between Cp and Cp' is weakened by co-irradiation (dotted blue line).

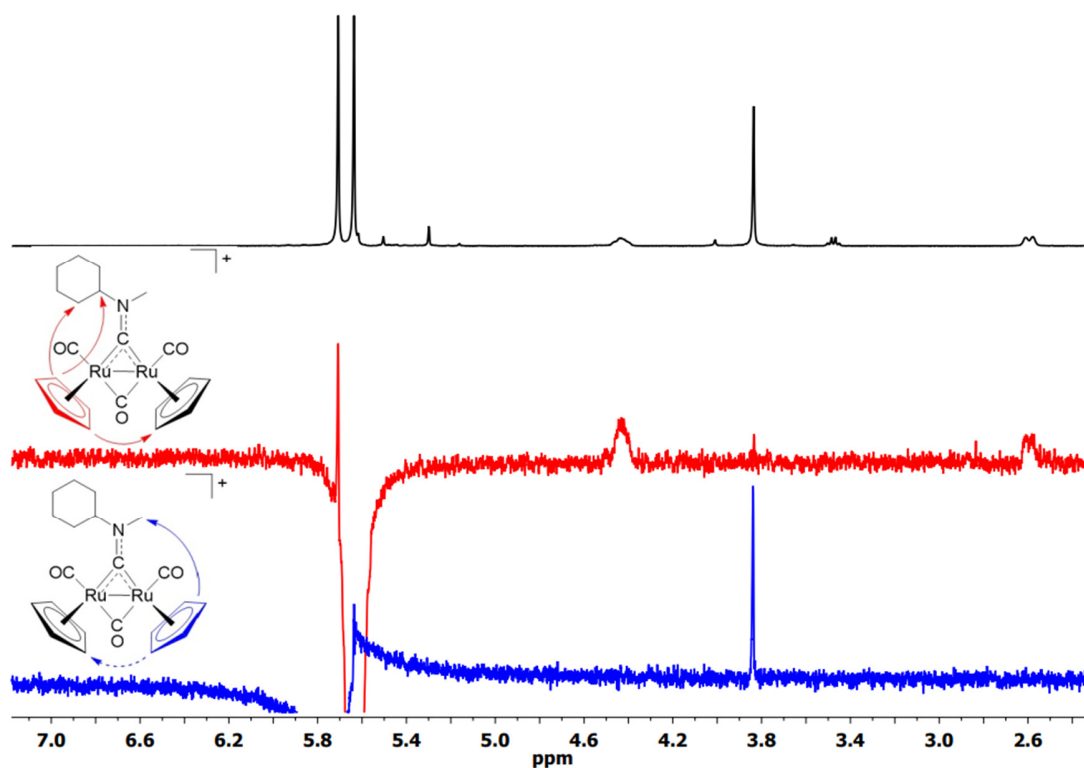

**Figure S17.**  $^1\text{H}$  NMR spectrum (401 MHz,  $\text{CDCl}_3$ ) of  $[\text{Ru}_2\text{Cp}_2(\text{CO})_2(\mu\text{-CO})\{\mu\text{-CNMe(Xyl)}\}]\text{CF}_3\text{SO}_3$ , [2c] $\text{CF}_3\text{SO}_3$ .

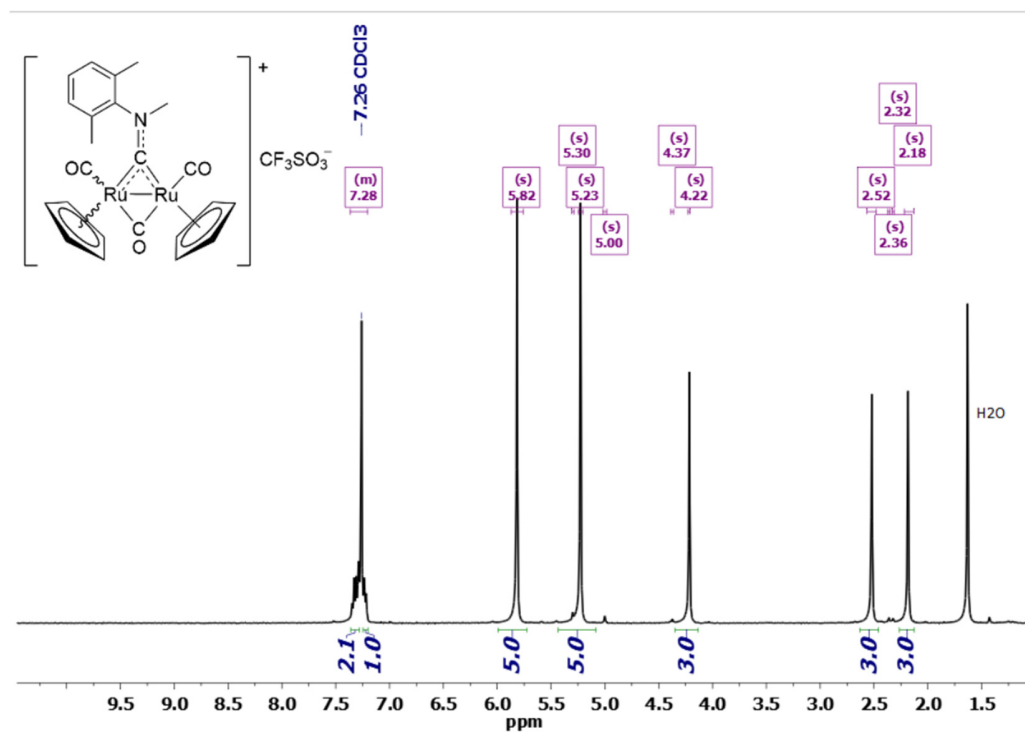

**Figure S18.**  $^{13}\text{C}\{^1\text{H}\}$  NMR spectrum (101 MHz,  $\text{CDCl}_3$ ) of  $[\mathbf{2c}]\text{CF}_3\text{SO}_3$ .

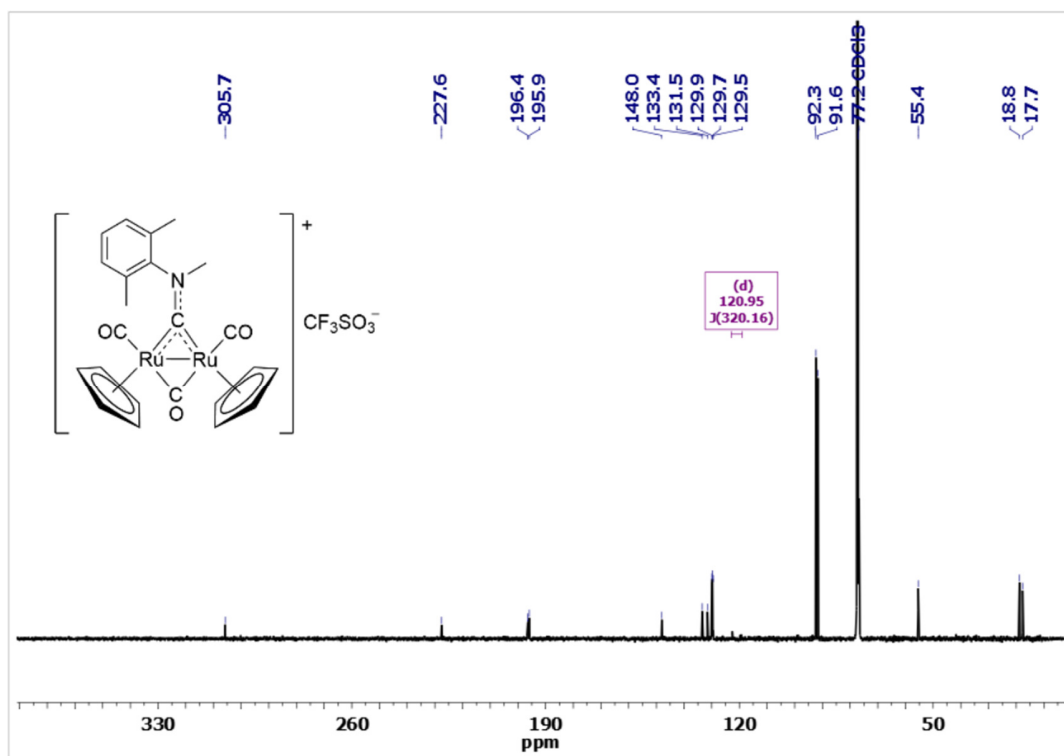

**Figure S19.** Black line:  $^1\text{H}$  NMR spectrum (401 MHz, acetone- $d_6$ ) of *cis*- $[\mathbf{2c}]\text{CF}_3\text{SO}_3$ . Blue line:  $^1\text{H}$  NOESY with irradiation at 5.82 ppm (Cp). Red line:  $^1\text{H}$  NOESY with irradiation at 5.23 ppm (Cp'). Observed NOEs are indicated by the arrows.

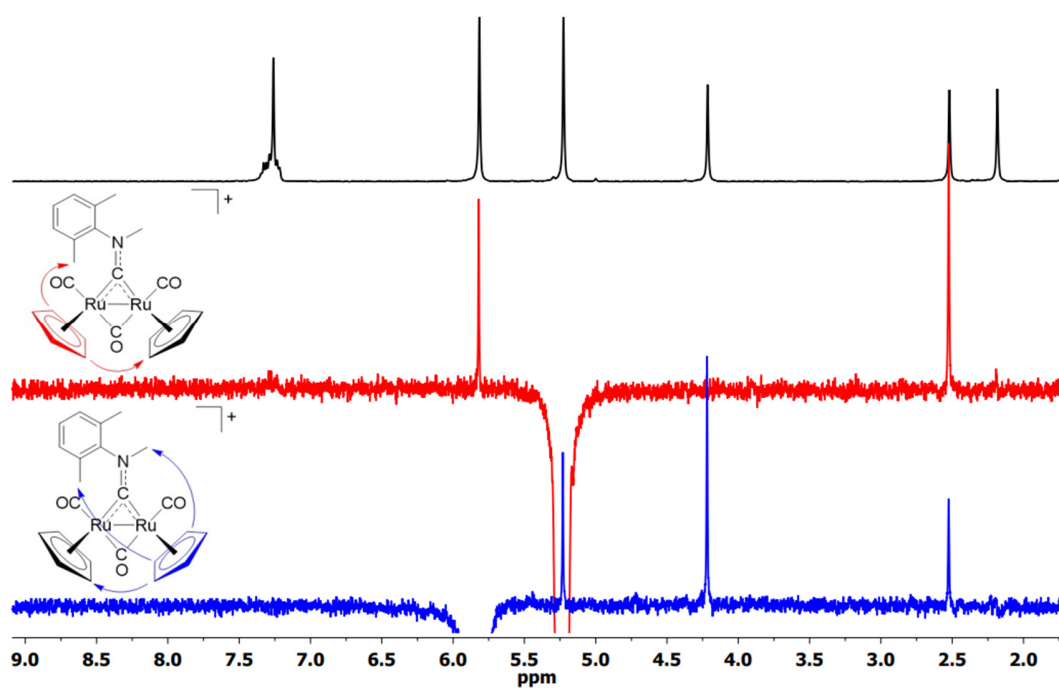

**Figure S20.**  $^1\text{H}$  NMR spectrum (401 MHz, acetone- $d_6$ ) of  $[\text{Ru}_2\text{Cp}_2(\text{CO})_2(\mu\text{-CO})\{\mu\text{-CNMe}(1H\text{-indol-5-yl})\}]\text{CF}_3\text{SO}_3$ , **[2d]** $\text{CF}_3\text{SO}_3$ . The integration is related to the signals of the major (*cis*) + minor (*trans*) isomers.

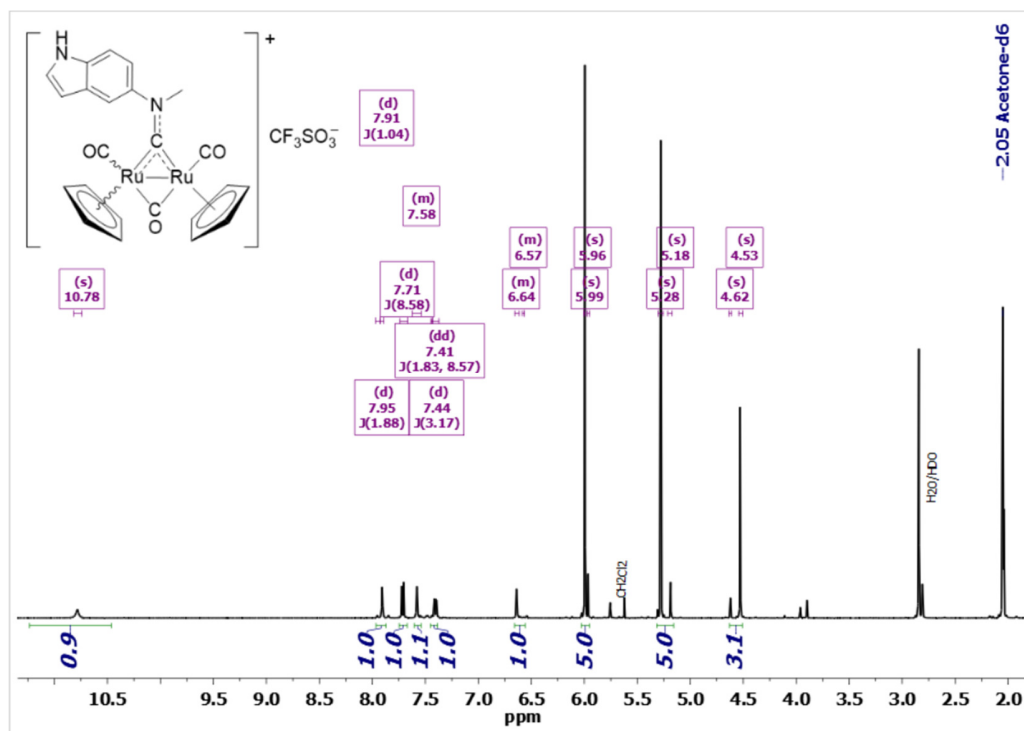

**Figure S21.**  $^{13}\text{C}\{^1\text{H}\}$  NMR spectrum (101 MHz, acetone- $d_6$ ) of **[2d]** $\text{CF}_3\text{SO}_3$ .

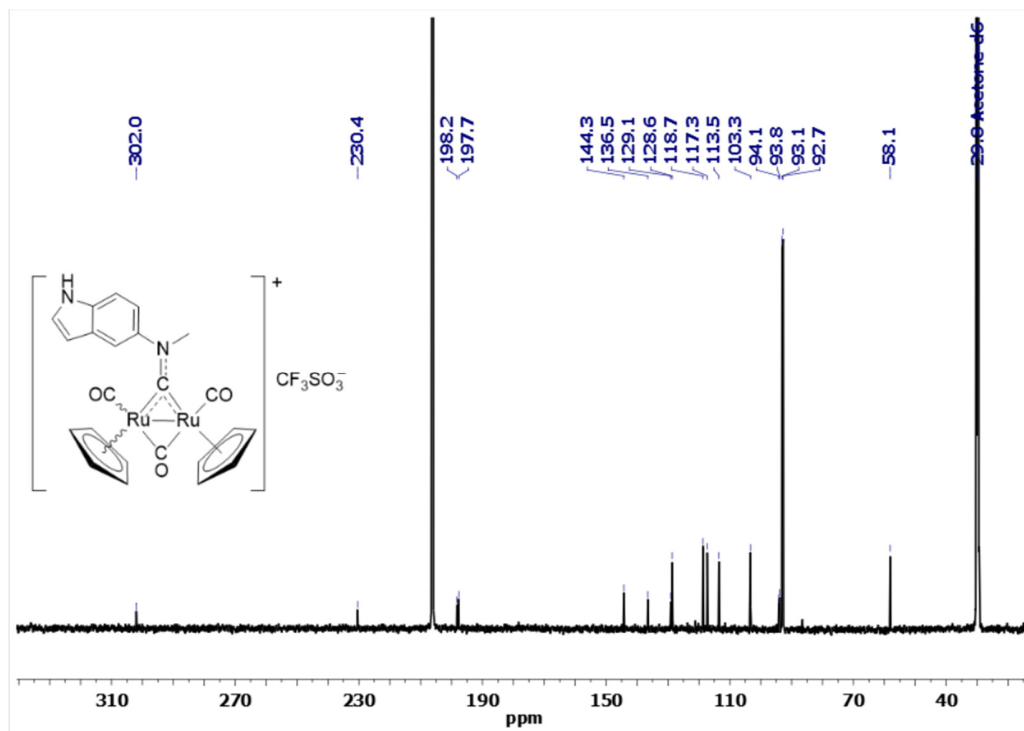



**Figure S22.** Black line:  $^1\text{H}$  NMR spectrum (401 MHz, acetone- $d_6$ ) of *cis*-[2d] $\text{CF}_3\text{SO}_3$ . Blue line:  $^1\text{H}$  NOESY with irradiation at 5.99 ppm (Cp). Red line:  $^1\text{H}$  NOESY with irradiation at 5.28 ppm (Cp'). Observed NOEs are indicated by the arrows.

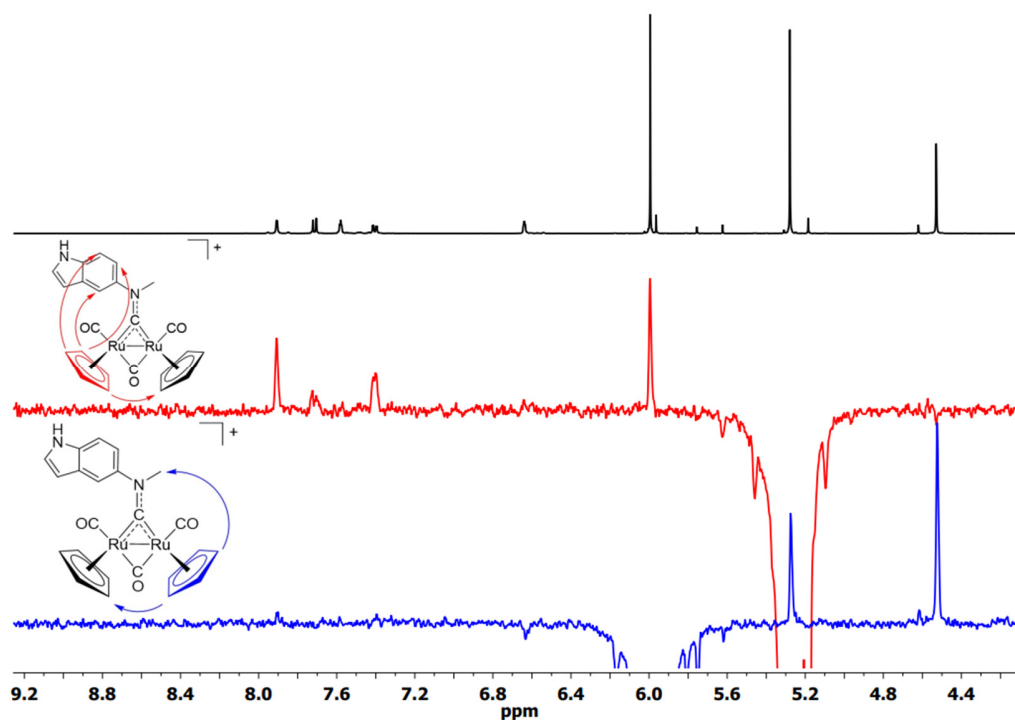

**Figure S23.**  $^1\text{H}$  NMR spectrum (401 MHz,  $\text{CDCl}_3$ ) of  $[\text{Ru}_2\text{Cp}_2(\text{CO})_2(\mu\text{-CO})\{\mu\text{-CNMe}(2\text{-naphthyl})\}]\text{CF}_3\text{SO}_3$ , [2e] $\text{CF}_3\text{SO}_3$ . The integration is related to the signals of the major (*cis*) + minor (*trans*) isomers.

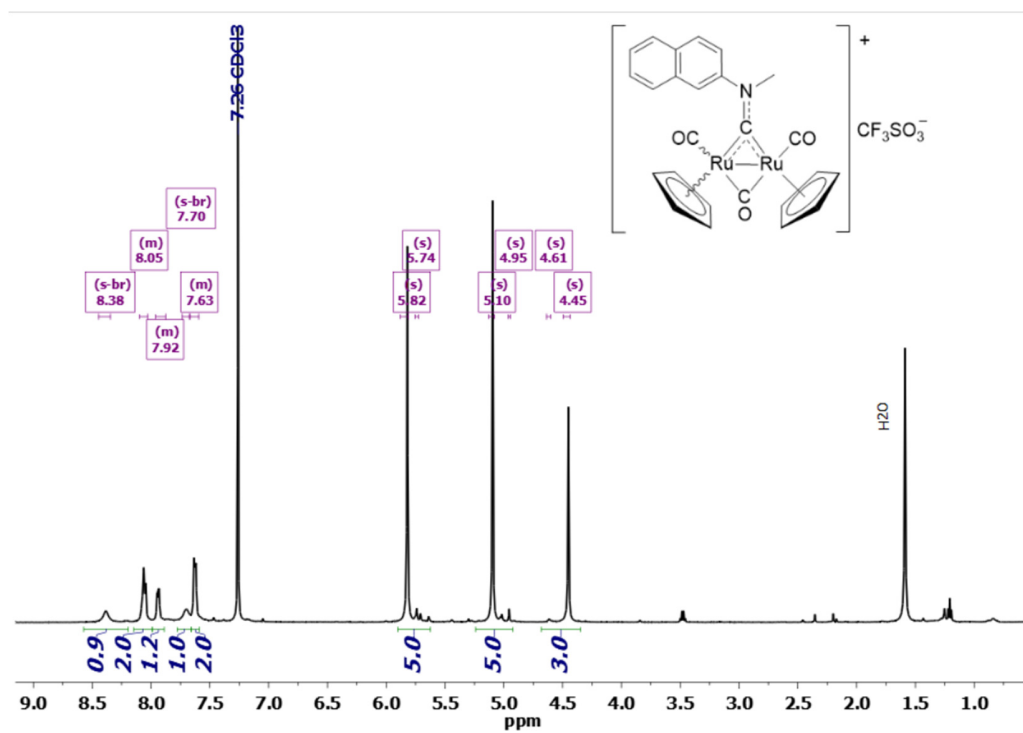

**Figure S24.**  $^1\text{H}$  NMR spectrum (401 MHz,  $\text{CDCl}_3$ ) of  $[\text{Ru}_2\text{Cp}_2(\text{CO})_2(\mu\text{-CO})\{\mu\text{-CNMe}(4\text{-C}_6\text{H}_4\text{OMe})\}]\text{CF}_3\text{SO}_3$ , **[2f]** $\text{CF}_3\text{SO}_3$  + impurities. Only the signals of the major isomer are highlighted and integrated.

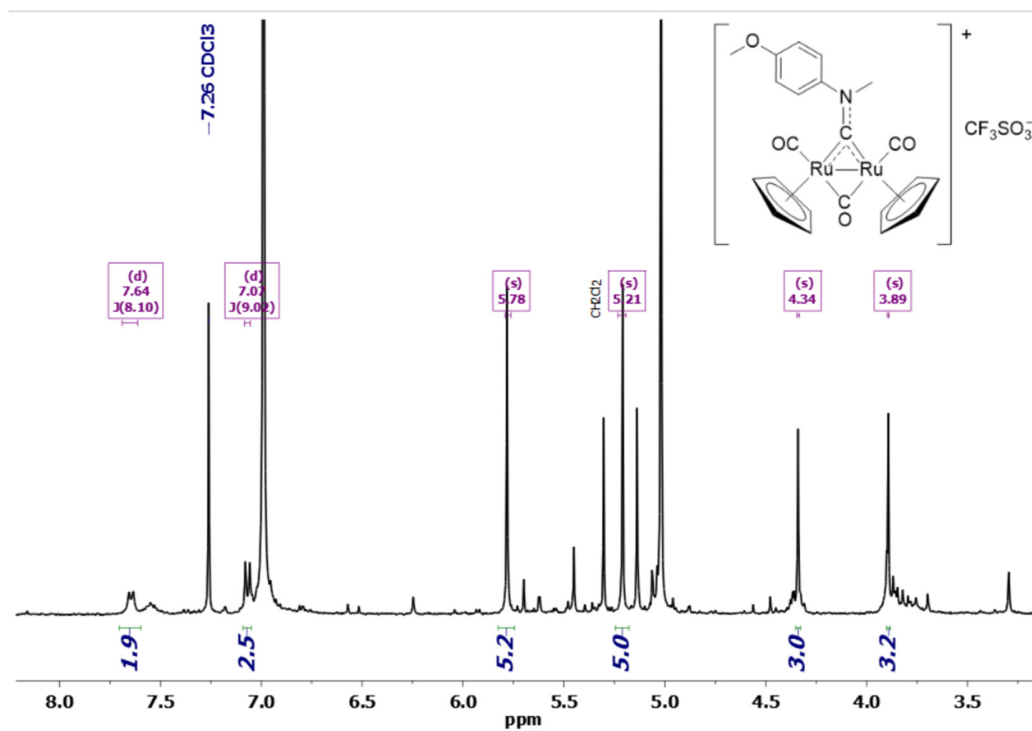

**Figure S25.**  $^1\text{H}$  NMR spectrum (401 MHz,  $\text{CDCl}_3$ ) of  $[\text{Ru}_2\text{Cp}_2(\text{CO})_2(\mu\text{-CO})\{\mu\text{-}(S)\text{-CN}(\text{Me})\text{CH}(\text{Me})\text{Ph}\}]\text{CF}_3\text{SO}_3$ , **[2g]** $\text{CF}_3\text{SO}_3$  + impurities. Only the signals of the major isomer are highlighted and integrated.

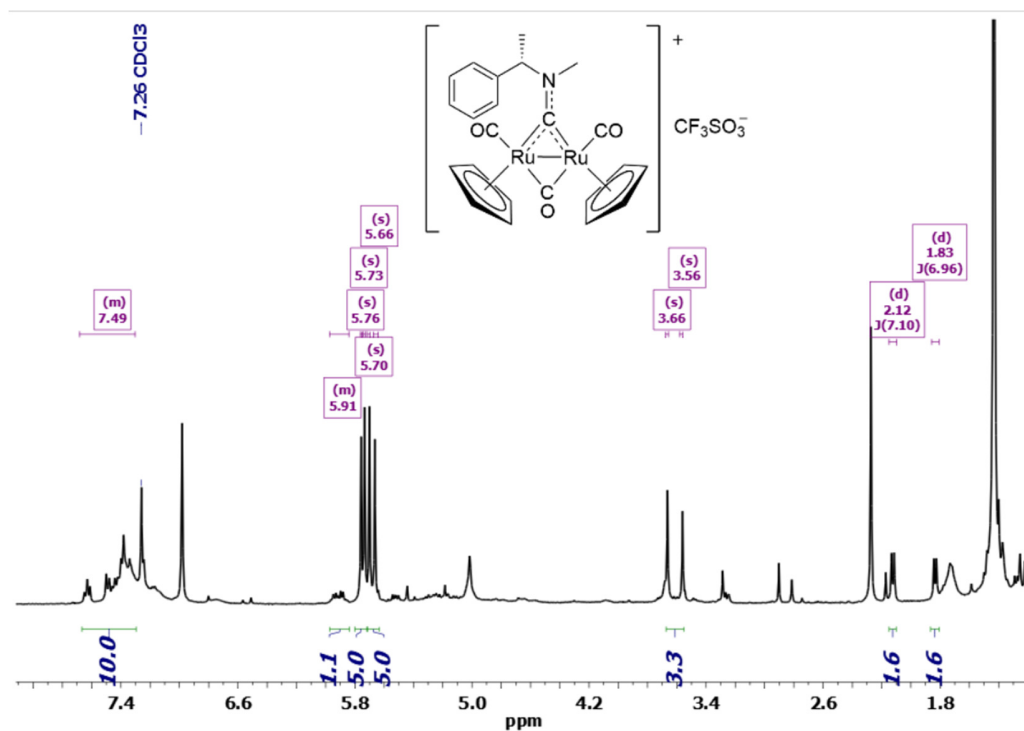

**Table S1.** Comparison of selected IR data for *cis*-[M<sub>2</sub>Cp<sub>2</sub>(CO)<sub>2</sub>(μ-CO){μ-CNMe(R)}]<sup>+</sup> (M = Fe, Ru) complexes.

| R [c]         | Complex [a]                          | IR (CH <sub>2</sub> Cl <sub>2</sub> ): $\tilde{\nu}$ / cm <sup>-1</sup> |              |              |              | IR (solid state): $\tilde{\nu}$ / cm <sup>-1</sup> |              |              |              |
|---------------|--------------------------------------|-------------------------------------------------------------------------|--------------|--------------|--------------|----------------------------------------------------|--------------|--------------|--------------|
|               |                                      | $\nu$ (t-CO)                                                            | $\nu$ (t-CO) | $\nu$ (μ-CO) | $\nu$ (μ-CN) | $\nu$ (t-CO)                                       | $\nu$ (t-CO) | $\nu$ (μ-CO) | $\nu$ (μ-CN) |
| Me            | [2a] <sup>+</sup>                    | 2026                                                                    | 1993         | 1840         | 1614         | 2011                                               | 1987         | 1834         | 1612         |
|               | [2a <sup>Fe</sup> ] <sup>+</sup> [b] | 2022                                                                    | 1990         | 1835         | 1602         | 2021                                               | 1991         | 1814         | 1592         |
|               | $\Delta$ (Fe→Ru)                     | +4                                                                      | +3           | +5           | +12          | -10                                                | -4           | +20          | +20          |
| Cy            | [2b] <sup>+</sup>                    | 2024                                                                    | 1990         | 1841         | 1578         | 2010                                               | 1983         | 1823         | 1573         |
|               | [2b <sup>Fe</sup> ] <sup>+</sup> [b] | 2020                                                                    | 1988         | 1835         | 1567         | 2006                                               | 1982         | 1822         | 1565         |
|               | $\Delta$ (Fe→Ru)                     | +4                                                                      | +2           | +6           | +11          | +4                                                 | +1           | +1           | +8           |
| Xyl           | [2c] <sup>+</sup>                    | 2027                                                                    | 1994         | 1846         | 1540         | 2017                                               | 1988         | 1841         | 1538         |
|               | [2c <sup>Fe</sup> ] <sup>+</sup> [b] | 2023                                                                    | 1992         | 1840         | 1530         | 2012                                               | 1989         | 1832         | 1527         |
|               | $\Delta$ (Fe→Ru)                     | +4                                                                      | +2           | +6           | +10          | +5                                                 | -1           | +9           | +11          |
| Ind           | [2d] <sup>+</sup>                    | 2025                                                                    | 1995         | 1841         | 1548         | 2011                                               | 1990         | 1840         | 1548         |
|               | [2d <sup>Fe</sup> ] <sup>+</sup> [b] | 2022                                                                    | 1992         | 1836         | 1542         | 2004                                               | 1985         | 1833         | 1540         |
|               | $\Delta$ (Fe→Ru)                     | +3                                                                      | +3           | +5           | +6           | +7                                                 | +5           | +7           | +8           |
| Naph          | [2e] <sup>+</sup>                    | 2026                                                                    | 1993         | 1842         | 1544         |                                                    |              | <i>n.r.</i>  |              |
|               | [2e <sup>Fe</sup> ] <sup>+</sup> [b] | 2022                                                                    | 1990         | 1837         | 1538         |                                                    |              |              |              |
|               | $\Delta$ (Fe→Ru)                     | +4                                                                      | +3           | +5           | +6           |                                                    |              |              |              |
| <i>p</i> Anis | [2f] <sup>+</sup>                    | 2025                                                                    | 1991         | 1841         | 1550         |                                                    |              | <i>n.r.</i>  |              |
|               | [2f <sup>Fe</sup> ] <sup>+</sup> [b] | 2021                                                                    | 1989         | 1836         | 1540         |                                                    |              |              |              |
|               | $\Delta$ (Fe→Ru)                     | +4                                                                      | +2           | +5           | +10          |                                                    |              |              |              |
| Bn            | [2h] <sup>+</sup> [b]                | 2025                                                                    | 1992         | 1841         | 1582         |                                                    |              | <i>n.r.</i>  |              |
|               | [2h <sup>Fe</sup> ] <sup>+</sup> [b] | 2020                                                                    | 1898         | 1836         | 1576         |                                                    |              |              |              |
|               | $\Delta$ (Fe→Ru)                     | +5                                                                      | +3           | +5           | +6           |                                                    |              |              |              |

[a] All complexes as CF<sub>3</sub>SO<sub>3</sub><sup>-</sup> salts. [b] Diiron homologue of the respective diruthenium complex. Data taken from the literature. <sup>4,5,6</sup> [c] Abbreviation list: Cy = C<sub>6</sub>H<sub>11</sub>, Xyl = 2,6-C<sub>6</sub>H<sub>3</sub>Me<sub>2</sub>, Ind = 1*H*-indol-5-yl, Naph = 2-naphthyl, *p*Anis = 4-C<sub>6</sub>H<sub>4</sub>OMe, Bn = CH<sub>2</sub>Ph. *n.r.* = not recorded.

[Fe<sub>2</sub>Cp<sub>2</sub>(CO)<sub>2</sub>(μ-CO){μ-CNMe(Xyl)}]CF<sub>3</sub>SO<sub>3</sub>, [2c<sup>Fe</sup>]CF<sub>3</sub>SO<sub>3</sub>.<sup>6</sup> The IR spectrum was recorded for comparative purposes. IR (solid state):  $\tilde{\nu}$ /cm<sup>-1</sup> = 3112w, 2012s (CO), 1989s-sh (CO), 1832s (μ-CO), 1590w, 1546m-sh, 1527m (μ-CN), 1505w-sh, 1469w, 1434w, 1420w, 1393m, 1384w-sh, 1362w, 1272s-sh, 1259s (SO<sub>3</sub>), 1223m-sh (SO<sub>3</sub>), 1212m-sh, 1151s (SO<sub>3</sub>), 1114m, 1085m, 1067w, 1030s, 1009m-sh, 859m, 840m, 807w, 786m, 770s, 732s, 665s.

**Table S2.** Comparison of selected NMR data for *cis*-[M<sub>2</sub>Cp<sub>2</sub>(CO)<sub>2</sub>(μ-CO){μ-CNMe(R)}]<sup>+</sup> (M = Fe, Ru) complexes.

| R <sup>[a]</sup> | Complex <sup>[b]</sup>                          | <sup>13</sup> C NMR <sup>[c]</sup> : δ / ppm |        |                |      |      |                  | <sup>1</sup> H NMR <sup>[c]</sup> : δ / ppm |        |        |
|------------------|-------------------------------------------------|----------------------------------------------|--------|----------------|------|------|------------------|---------------------------------------------|--------|--------|
|                  |                                                 | μ-CN                                         | μ-CO   | t-CO           | Cp   | Cp'  | NCH <sub>3</sub> | Cp                                          | Cp'    | NMe    |
| Me               | [2a] <sup>+</sup>                               | 295.4                                        | 231.0  | 197.6          | 92.8 |      | 54.6             | 5.88                                        |        | 4.15   |
|                  | [2a <sup>Fe</sup> ] <sup>+</sup> <sup>[d]</sup> | 315.5                                        | 257.6  | 209.3          | 90.8 |      | 54.6             | 5.54                                        |        | 4.35   |
|                  | Δ (Fe→Ru)                                       | - 20.1                                       | - 26.6 | - 11.7         | +2   |      | 0                | + 0.34                                      |        | - 0.20 |
| Cy               | [2b] <sup>+</sup>                               | 294.3                                        | 229.8  | 196.4, 195.7   | 92.1 | 91.8 | 47.3             | 5.71                                        | 5.64   | 3.84   |
|                  | [2b <sup>Fe</sup> ] <sup>+</sup> <sup>[d]</sup> | 316.4                                        | 255.3  | 208.5, 207.6   | 90.3 | 90.1 | 46.8             | 5.36                                        | 5.27   | 4.06   |
|                  | Δ (Fe→Ru)                                       | - 22.1                                       | - 25.5 | - 12.1, - 11.9 | +1.8 | +1.7 | 0.5              | + 0.35                                      | + 0.37 | - 0.22 |
| Xyl              | [2c] <sup>+</sup>                               | 305.7                                        | 227.6  | 196.4, 195.9   | 92.3 | 91.6 | 55.4             | 5.82                                        | 5.23   | 4.21   |
|                  | [2c <sup>Fe</sup> ] <sup>+</sup> <sup>[d]</sup> | 327.8                                        | 253.9  | 208.6          | 91.3 | 91.1 | 56.3             | 5.48                                        | 4.83   | 4.44   |
|                  | Δ (Fe→Ru)                                       | - 22.1                                       | - 26.3 | - 12.2, - 12.7 | +1.0 | +0.5 | - 0.9            | + 0.34                                      | + 0.40 | - 0.23 |
| Ind              | [2d] <sup>+</sup>                               | 302.0                                        | 230.4  | 198.3, 197.7   | 93.1 | 92.7 | 58.1             | 5.99                                        | 5.28   | 4.53   |
|                  | [2d <sup>Fe</sup> ] <sup>+</sup> <sup>[d]</sup> | 324.9                                        | 255.9  | 209.8, 209.2   | 91.2 | 91.0 | 58.5             | 5.39                                        | 4.65   | 4.53   |
|                  | Δ (Fe→Ru)                                       | - 22.9                                       | - 25.5 | - 11.5, - 11.5 | +1.9 | +1.7 | - 0.4            | + 0.60                                      | + 0.63 | 0      |

[a] Abbreviation list: Cy = C<sub>6</sub>H<sub>11</sub>, Xyl = 2,6-C<sub>6</sub>H<sub>3</sub>Me<sub>2</sub>, Ind = 1*H*-indol-5-yl. [b] All complexes as CF<sub>3</sub>SO<sub>3</sub><sup>-</sup> salts. [c] NMR data in CDCl<sub>3</sub> except [2a]<sup>+</sup> (acetone-d<sub>6</sub>), [2a<sup>Fe</sup>]<sup>+</sup> (<sup>1</sup>H: acetone-d<sub>6</sub>, <sup>13</sup>C: DMSO-d<sub>6</sub>), [2d]<sup>+</sup> (acetone-d<sub>6</sub>), [2d<sup>Fe</sup>]<sup>+</sup> (CD<sub>3</sub>CN). [d] Diiron homologue of the respective diruthenium complex. Data taken from the literature.<sup>4,6</sup>

## Synthesis and characterization of [3a]CF<sub>3</sub>SO<sub>3</sub>

**Chart S1.** Structure of [Ru<sub>2</sub>Cp<sub>2</sub>(CO)(NCMe)(μ-CO){μ-CNMe<sub>2</sub>}]<sup>+</sup>, [3a]<sup>+</sup>.

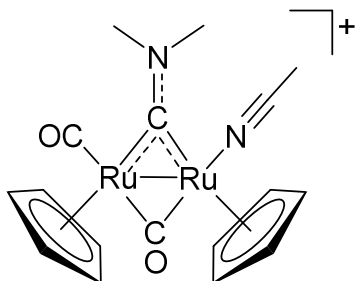

The title compound was prepared according to a modified literature procedure.<sup>7</sup> A solution of [2a]CF<sub>3</sub>SO<sub>3</sub> in deaerated MeCN (10 mL) under N<sub>2</sub> was treated with Me<sub>3</sub>NO·2H<sub>2</sub>O (75 mg, 0.67 mmol) and stirred at room temperature for 1 h. Conversion was checked by IR then volatiles were removed under vacuum. The brown residue was dissolved in CH<sub>2</sub>Cl<sub>2</sub> and moved on top of an alumina column (h 4, d 3.4 cm). Impurities were eluted with CH<sub>2</sub>Cl<sub>2</sub> then a brown band was collected with MeCN and taken to dryness under vacuum. The residue was triturated in Et<sub>2</sub>O and the suspension was filtered. The resulting brown solid was washed with Et<sub>2</sub>O and dried under vacuum (40 °C). Yield: 124 mg, 61 %. Alternatively, [3a]<sup>+</sup> formed during alumina chromatography of [2a]<sup>+</sup> using MeCN as eluent, and a mixture of the two CF<sub>3</sub>SO<sub>3</sub><sup>-</sup> salts was obtained upon volatiles removal under vacuum. Anal. calcd. for C<sub>18</sub>H<sub>19</sub>F<sub>3</sub>N<sub>2</sub>O<sub>5</sub>Ru<sub>2</sub>S: C, 34.07; H, 3.02; N, 4.41; S, 5.05. Found: C, 33.8; H, 2.98; N, 4.36; S, 5.00. IR (solid state):  $\tilde{\nu}/\text{cm}^{-1}$  = 3116-3087w, 2986w, 2940w, 2930w, 2221w-br (C≡N), 2191w, 2175w, 1973s (CO), 1789s (μ-CO), 1608m (μ-CN), 1557w-sh, 1430w, 1412w, 1398m, 1354w, 1277s-sh, 1259s (SO<sub>3</sub>), 1224m-sh (SO<sub>3</sub>), 1201m, 1145s (SO<sub>3</sub>), 1062w, 1029s, 1014m-sh, 996m-sh, 875w, 840m, 817m, 779s, 753m-sh. IR (CH<sub>2</sub>Cl<sub>2</sub>):  $\tilde{\nu}/\text{cm}^{-1}$  = 1981s (CO), 1814s (μ-CO), 1595m (μ-CN), 1559w. <sup>1</sup>H NMR (acetone-d<sub>6</sub>):  $\delta/\text{ppm}$  = 5.60 (s, 5H, Cp); 5.37 (s, 5H, Cp'); 4.18 (s, 3H, NCH<sub>3</sub>); 4.08 (s, 3H, NCH<sub>3</sub>'); 2.27 (s, 3H, CCH<sub>3</sub>); signals ascribable to a second (*trans*) isomer were not detected.

**Figure S26.**  $^1\text{H}$  NMR spectrum (401 MHz, acetone- $d_6$ ) of  $[\text{Ru}_2\text{Cp}_2(\text{CO})(\text{NCMe})(\mu\text{-CO})\{\mu\text{-CNMe}_2\}]\text{CF}_3\text{SO}_3$ , **[3a]** $\text{CF}_3\text{SO}_3$ .

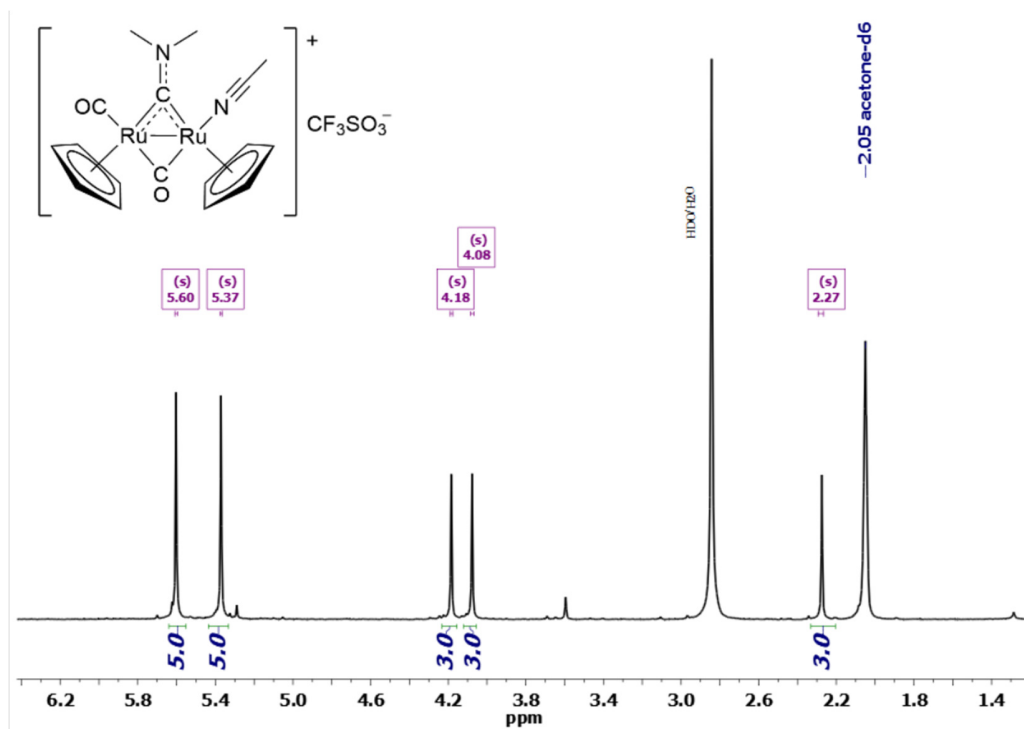

## Log $P_{ow}$ , solubility and stability studies in aqueous media

**Table S3.** Comparison of solubility in water (D<sub>2</sub>O) and octanol-water partition coefficient (Log<sub>10</sub>  $P_{ow}$ ) for [M<sub>2</sub>Cp<sub>2</sub>(CO)<sub>2</sub>(μ-CO){μ-CNMe(R)}]<sup>+</sup> (M = Fe, Ru) complexes.

| Complex <sup>[a]</sup>                          | D <sub>2</sub> O solubility / M       | Log <sub>10</sub> $P_{ow}$   |
|-------------------------------------------------|---------------------------------------|------------------------------|
| [2a] <sup>+</sup>                               | 2.3 · 10 <sup>-3</sup>                | - 1.07 ± 0.08                |
| [2a <sup>Fe</sup> ] <sup>+</sup> <sup>[b]</sup> | 3.2 · 10 <sup>-3</sup>                | - 0.99 ± 0.06 <sup>[c]</sup> |
| [2b] <sup>+</sup>                               | 7.8 · 10 <sup>-4</sup>                | 0.06 ± 0.01                  |
| [2b <sup>Fe</sup> ] <sup>+</sup> <sup>[b]</sup> | 6.2 · 10 <sup>-3</sup>                | 0.0 ± 0.1                    |
| [2c] <sup>+</sup>                               | 1.6 · 10 <sup>-3</sup>                | 0.05 ± 0.03                  |
| [2c <sup>Fe</sup> ] <sup>+</sup> <sup>[b]</sup> | 1.4 · 10 <sup>-3</sup>                | - 0.27 ± 0.04                |
| [2d] <sup>+</sup>                               | ≈ 2 · 10 <sup>-4</sup> <sup>[d]</sup> | 0.10 ± 0.02                  |
| [2d <sup>Fe</sup> ] <sup>+</sup> <sup>[b]</sup> | ≈ 3 · 10 <sup>-4</sup>                | - 0.46 ± 0.02                |
| [2e] <sup>+</sup>                               | ≈ 1 · 10 <sup>-4</sup> <sup>[d]</sup> | 0.74 ± 0.03                  |
| [2e <sup>Fe</sup> ] <sup>+</sup> <sup>[b]</sup> | < 3 · 10 <sup>-4</sup>                | 0.29 ± 0.03                  |
| [2h] <sup>+</sup>                               | 1.1 · 10 <sup>-3</sup>                | 0.11 ± 0.03                  |
| [2h <sup>Fe</sup> ] <sup>+</sup> <sup>[b]</sup> | 2.9 · 10 <sup>-3</sup>                | - 0.51 ± 0.02                |

[a] All complexes as CF<sub>3</sub>SO<sub>3</sub><sup>-</sup> salts. [b] Diiron homologue of the respective diruthenium complex. Data taken from the literature.<sup>4,8</sup> [c] Re-determined with respect to the literature value (- 0.9 ± 0.1). [d] Below the lowest quantitation value (3 · 10<sup>-4</sup> M).

**Figure S27.**  $^1\text{H}$  NMR spectrum (401 MHz) of a saturated  $\text{D}_2\text{O}$  solution of  $[\mathbf{2a}]\text{CF}_3\text{SO}_3$ .

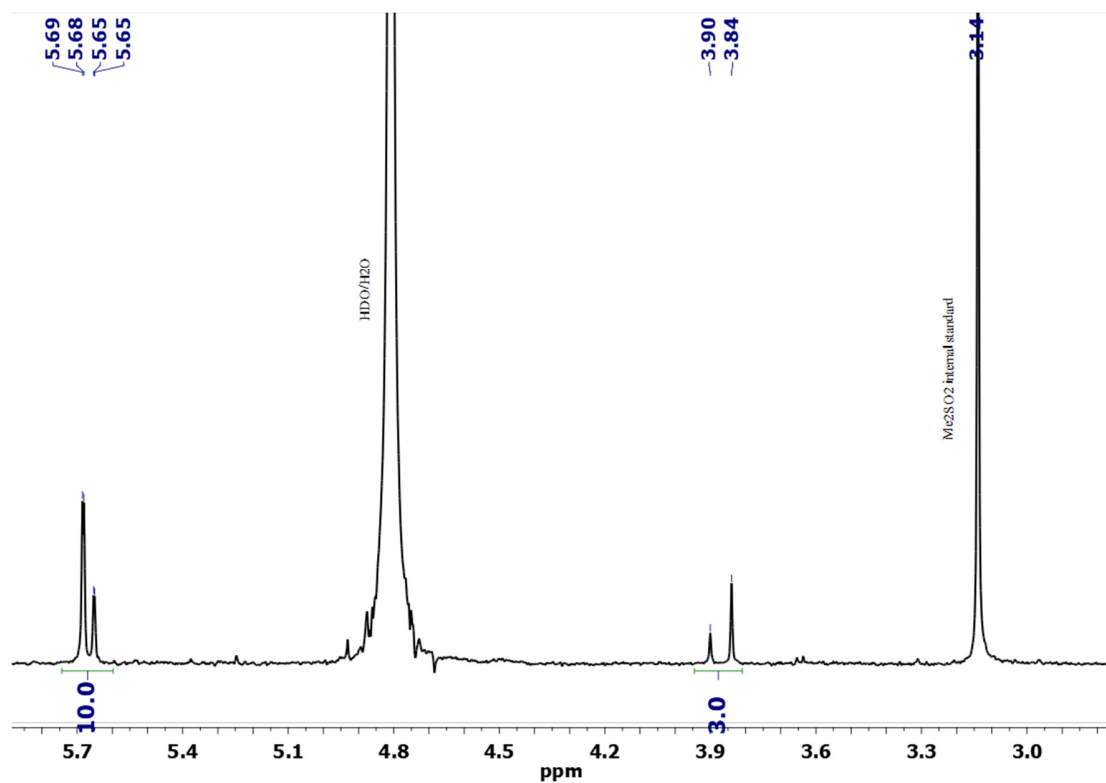

**Figure S28.**  $^1\text{H}$  NMR spectrum (401 MHz) of a saturated  $\text{D}_2\text{O}$  solution of  $[\mathbf{2b}]\text{CF}_3\text{SO}_3$  (3-6 ppm range).

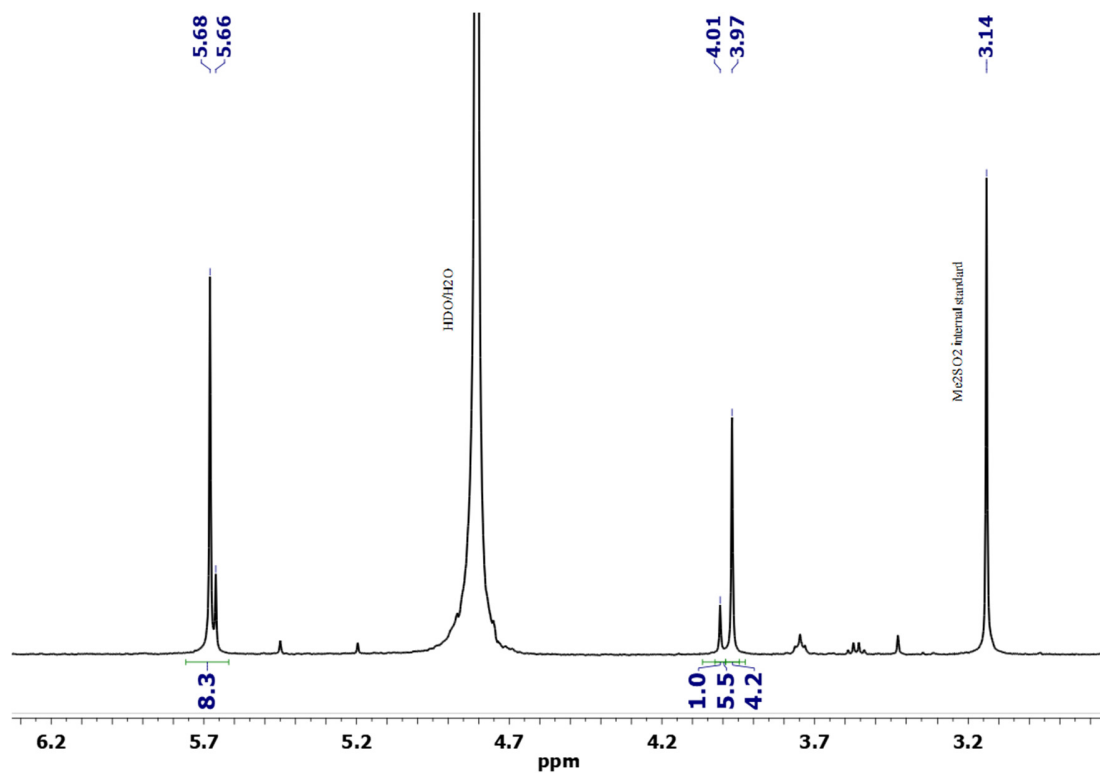



**Figure S29.**  $^1\text{H}$  NMR spectrum (401 MHz) of a saturated  $\text{D}_2\text{O}$  solution of  $[\mathbf{2c}]\text{CF}_3\text{SO}_3$ .

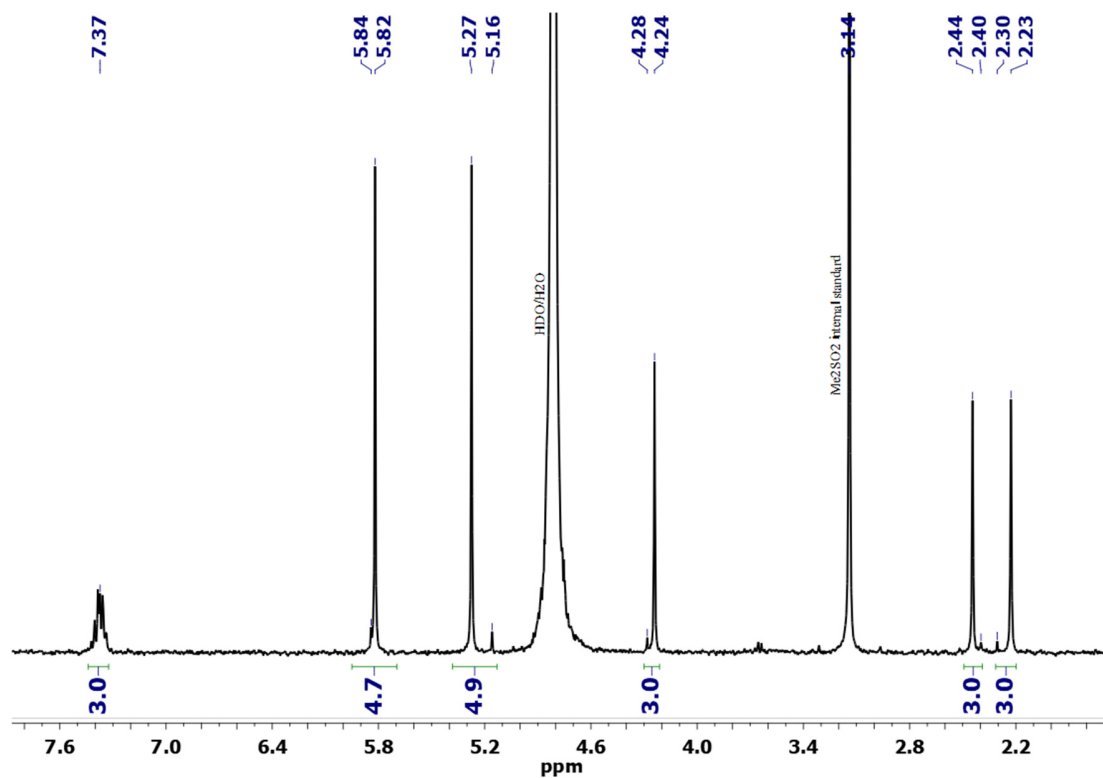

**Figure S30.**  $^1\text{H}$  NMR spectrum (401 MHz) of a freshly-prepared solution of  $[\mathbf{2c}]\text{CF}_3\text{SO}_3$  in  $\text{D}_2\text{O}/\text{CD}_3\text{OD}$  5:3 v/v (top, cyan line) and after 72 h at 37 °C (bottom, red line).

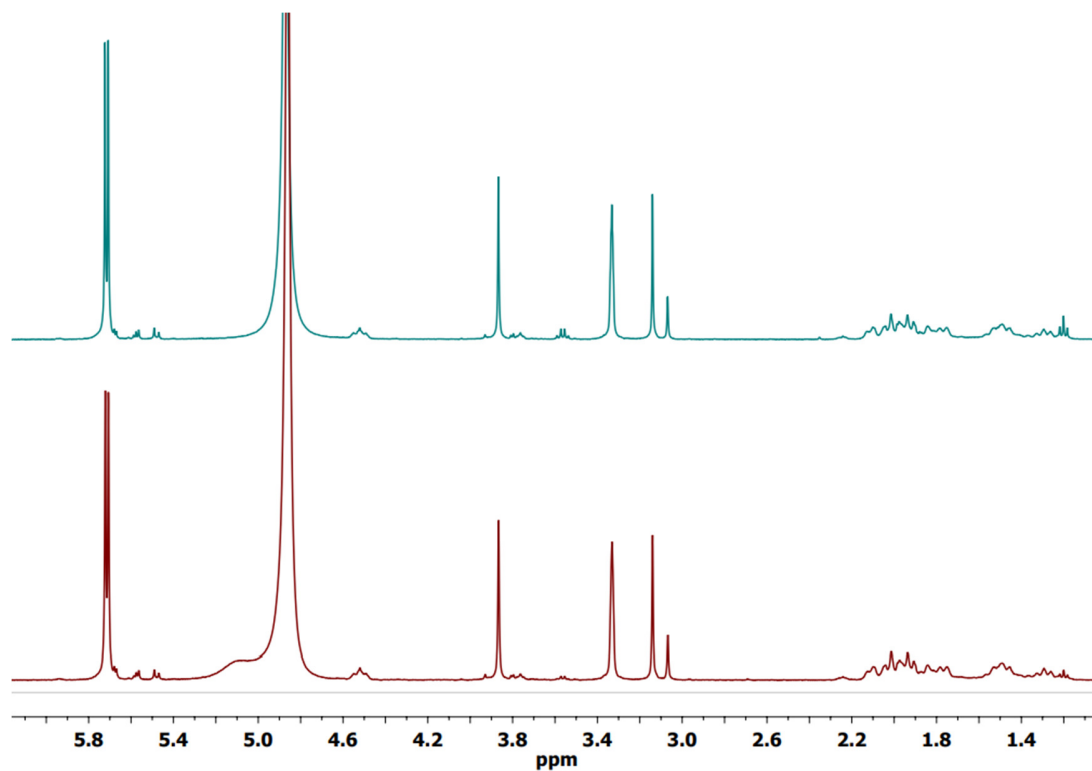

### NMR data for D<sub>2</sub>O and D<sub>2</sub>O/CD<sub>3</sub>OD solutions.

[**2a**]CF<sub>3</sub>SO<sub>3</sub>. <sup>1</sup>H NMR (D<sub>2</sub>O): δ/ppm = 5.68, 5.66 (s, 10H); 4.01, 3.97 (s, 6H). <sup>1</sup>H NMR (D<sub>2</sub>O/CD<sub>3</sub>OD 5:3 v/v): δ/ppm = 5.71, 5.69 (s, 10H); 4.04, 4.01 (s, 6H). Isomer (*cis/trans*) ratio = 4.5 (D<sub>2</sub>O); ≈ 11 (D<sub>2</sub>O/CD<sub>3</sub>OD 5:3 v/v).

[**2b**]CF<sub>3</sub>SO<sub>3</sub>. <sup>1</sup>H NMR (D<sub>2</sub>O): δ/ppm = 5.69, 5.68, 5.65, 5.65 (s, 10H); 3.90, 3.84 (s, 3H); 2.12–1.34 (m, 10H). <sup>1</sup>H NMR (D<sub>2</sub>O/CD<sub>3</sub>OD 5:3 v/v): δ/ppm = 5.72, 5.71, 5.68, 5.67 (s, 10H); 4.57–4.48 (m, 1H); 3.93, 3.87 (s, 3H); 2.16–1.68, 1.57–1.23 (m, 10H). Isomer (*cis/trans*) ratio = 2.5 (D<sub>2</sub>O); ≈ 30 (D<sub>2</sub>O/CD<sub>3</sub>OD 5:3 v/v).

[**2c**]CF<sub>3</sub>SO<sub>3</sub>. <sup>1</sup>H NMR (D<sub>2</sub>O): δ/ppm = 7.44–7.32 (m, 3H), 5.84, 5.82 (s, 5H); 5.27, 5.16 (s, 5H); 4.28, 4.24 (s, 3H), 2.44, 2.40 (s, 3H), 2.30, 2.23 (s, 3H). <sup>1</sup>H NMR (D<sub>2</sub>O/CD<sub>3</sub>OD 5:3 v/v): δ/ppm = 7.48–7.35 (m, 3H); 5.87, 5.86 (s, 5H); 5.30, 5.17 (s, 5H); 4.30, 4.26 (s, 3H); 2.47, 2.42 (s, 3H); 2.33, 2.24 (s, 3H). Isomer (*cis/trans*) ratio ≈ 25 (D<sub>2</sub>O and D<sub>2</sub>O/CD<sub>3</sub>OD 5:3 v/v).

[**2d**]CF<sub>3</sub>SO<sub>3</sub>. <sup>1</sup>H NMR (D<sub>2</sub>O): δ/ppm = 8.45 (s); 7.81 (d, *J* = 2.0 Hz, 1H); 7.70 (d, *J* = 8.6 Hz, 1H); 7.55 (d, *J* = 3.2 Hz, 1H); 7.34 (dd, *J* = 8.6, 2.0 Hz, 1H); 6.71 (dd, *J* = 3.1, 0.7 Hz, 1H); 5.78 (s, 5H); 5.11, 4.99 (s, 5H); 4.48, 4.40 (s, 3H). Isomer (*cis/trans*) ratio ≈ 11 (D<sub>2</sub>O).

[**2e**]CF<sub>3</sub>SO<sub>3</sub>.\* <sup>1</sup>H NMR (D<sub>2</sub>O): ppm = 8.22 (d, *J* = 8.7 Hz, 1H), 8.15–8.04 (m, 3H), 7.77–7.70 (m, 2H), 7.67 (dd, *J* = 8.7, 1.9 Hz, 1H), 5.84 (s, 5H), 5.12 (s, 5H), 4.46 (s, 3H). The presence of {RuCp} by-products in the isolated material prevented unambiguous identification of the <sup>1</sup>H NMR set of signals of the *trans* isomer.

[**2h**]CF<sub>3</sub>SO<sub>3</sub>. <sup>1</sup>H NMR (D<sub>2</sub>O): /ppm = 7.59–7.35 (m, 5H), 5.75 (s, 5H), 5.64 (s, 5H), 5.59–5.49 (m, 2H), 3.88 (s, 3H). <sup>1</sup>H NMR (D<sub>2</sub>O/CD<sub>3</sub>OD 5:3 v/v): δ/ppm = 7.58–7.29 (m, 5H), 5.78 (s, 5H), 5.68 (s, 5H), 5.62–5.54 (m, 2H), 3.90 (s, 3H). The presence of {RuCp} by-products in the isolated material prevented unambiguous identification of the <sup>1</sup>H NMR set of signals of the *trans* isomer.

### Cyclic voltammograms in CH<sub>2</sub>Cl<sub>2</sub> solution

**Figure S31.** Cyclic voltammograms of [2b]CF<sub>3</sub>SO<sub>3</sub> in a 1.0 mM CH<sub>2</sub>Cl<sub>2</sub> solution recorded at a Pt electrode between -1.8 and +1.9 V (blue line), and between -1.5 and +1.8 V (red line). [N<sup>n</sup>Bu<sub>4</sub>]PF<sub>6</sub> (0.2 mol·dm<sup>-3</sup>) as supporting electrolyte. Scan rate: 0.1 V s<sup>-1</sup>. Arrow indicates scan direction.

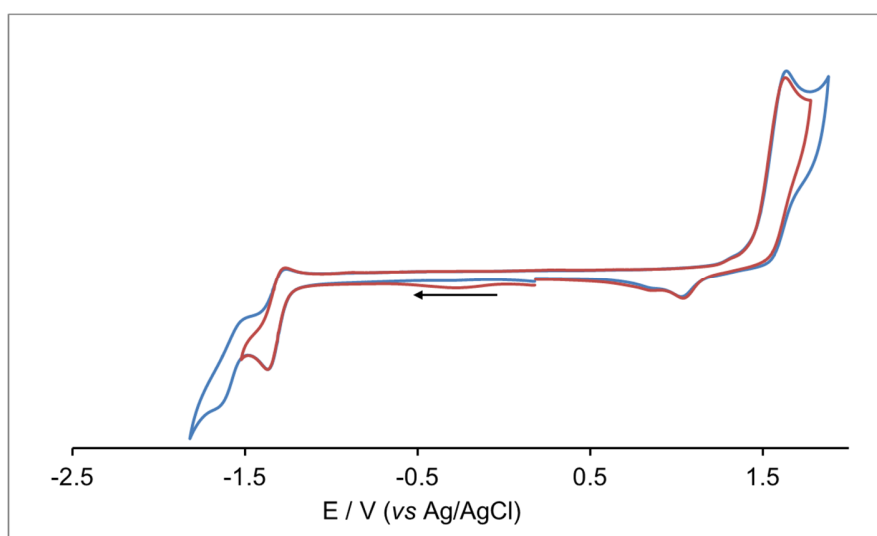

**Figure S32.** Cyclic voltammograms of [2c]CF<sub>3</sub>SO<sub>3</sub> in a 1.0 mM CH<sub>2</sub>Cl<sub>2</sub> solution recorded at a Pt electrode between +1.8 and -2.1 V (blue line), and between +1.8 and -1.55 V (red line). [N<sup>n</sup>Bu<sub>4</sub>]PF<sub>6</sub> (0.2 mol·dm<sup>-3</sup>) as supporting electrolyte. Scan rate: 0.1 V s<sup>-1</sup>. Arrow indicates scan direction.

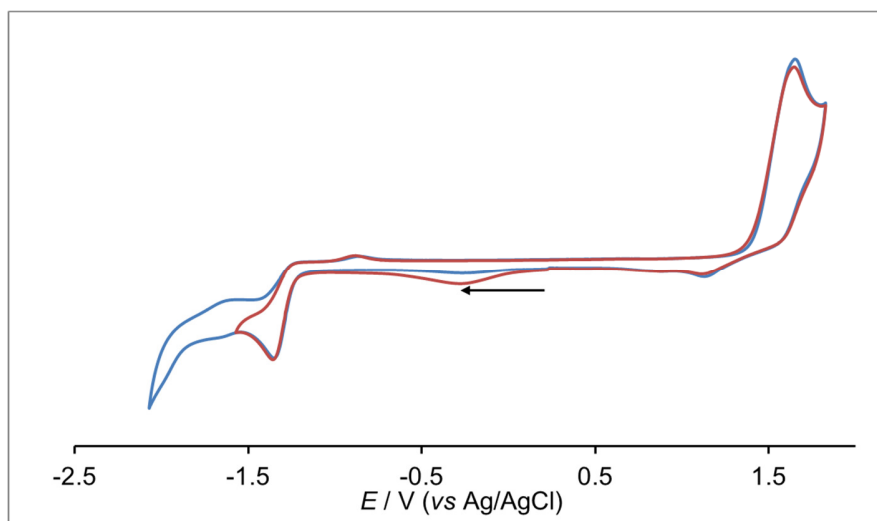

## X-Ray crystallography

**Table S4.** Crystal data and measurement details for [2a-c]CF<sub>3</sub>SO<sub>3</sub>.

|                                                             | [2a]CF <sub>3</sub> SO <sub>3</sub>                                              | [2b]CF <sub>3</sub> SO <sub>3</sub>                                              | [2c]CF <sub>3</sub> SO <sub>3</sub>                                              |
|-------------------------------------------------------------|----------------------------------------------------------------------------------|----------------------------------------------------------------------------------|----------------------------------------------------------------------------------|
| Formula                                                     | C <sub>17</sub> H <sub>16</sub> F <sub>3</sub> NO <sub>6</sub> Ru <sub>2</sub> S | C <sub>22</sub> H <sub>24</sub> F <sub>3</sub> NO <sub>6</sub> Ru <sub>2</sub> S | C <sub>24</sub> H <sub>22</sub> F <sub>3</sub> NO <sub>6</sub> Ru <sub>2</sub> S |
| FW                                                          | 621.51                                                                           | 689.63                                                                           | 711.62                                                                           |
| T, K                                                        | 100(2)                                                                           | 100(2)                                                                           | 100(2)                                                                           |
| $\lambda$ , Å                                               | 0.71073                                                                          | 0.71073                                                                          | 0.71073                                                                          |
| Crystal system                                              | Triclinic                                                                        | Monoclinic                                                                       | Triclinic                                                                        |
| Space group                                                 | <i>P</i> $\bar{1}$                                                               | <i>P</i> 2 <sub>1</sub> / <i>n</i>                                               | <i>P</i> $\bar{1}$                                                               |
| <i>a</i> , Å                                                | 8.9719(4)                                                                        | 9.0966(5)                                                                        | 10.0364(4)                                                                       |
| <i>b</i> , Å                                                | 10.3691(5)                                                                       | 17.9290(10)                                                                      | 10.2272(4)                                                                       |
| <i>c</i> , Å                                                | 11.3983(5)                                                                       | 14.9387(9)                                                                       | 12.5765(5)                                                                       |
| $\alpha$ , °                                                | 92.9110(10)                                                                      | 90                                                                               | 95.5780(10)                                                                      |
| $\beta$ , °                                                 | 104.6700(10)                                                                     | 101.888(2)                                                                       | 97.7480(10)                                                                      |
| $\gamma$ , °                                                | 96.868(2)                                                                        | 90                                                                               | 100.7070(10)                                                                     |
| Cell Volume, Å <sup>3</sup>                                 | 1014.83(8)                                                                       | 2384.1(2)                                                                        | 1246.90(9)                                                                       |
| Z                                                           | 2                                                                                | 4                                                                                | 2                                                                                |
| <i>D</i> <sub>c</sub> , g·cm <sup>-3</sup>                  | 2.034                                                                            | 1.921                                                                            | 1.895                                                                            |
| $\mu$ , mm <sup>-1</sup>                                    | 1.653                                                                            | 1.418                                                                            | 1.359                                                                            |
| F(000)                                                      | 608                                                                              | 1368                                                                             | 704                                                                              |
| Crystal size, mm                                            | 0.16×0.14×0.12                                                                   | 0.24×0.20×0.16                                                                   | 0.22×0.18×0.14                                                                   |
| $\theta$ limits, °                                          | 1.853–25.996                                                                     | 1.797–26.999                                                                     | 2.043–27.993                                                                     |
| Reflections collected                                       | 13509                                                                            | 50560                                                                            | 21088                                                                            |
| Independent reflections                                     | 3970 [ <i>R</i> <sub>int</sub> = 0.0283]                                         | 5208 [ <i>R</i> <sub>int</sub> = 0.0382]                                         | 6014 [ <i>R</i> <sub>int</sub> = 0.0180]                                         |
| Data / restraints / parameters                              | 3970 / 301 / 346                                                                 | 5208 / 0 / 317                                                                   | 6014 / 0 / 337                                                                   |
| Goodness on fit on F <sup>2</sup>                           | 1.097                                                                            | 1.151                                                                            | 1.127                                                                            |
| <i>R</i> <sub>1</sub> ( <i>I</i> > 2 $\sigma$ ( <i>I</i> )) | 0.0220                                                                           | 0.0179                                                                           | 0.0177                                                                           |
| <i>wR</i> <sub>2</sub> (all data)                           | 0.0532                                                                           | 0.0420                                                                           | 0.0411                                                                           |
| Largest diff. peak and hole, e Å <sup>-3</sup>              | 0.495 / -0.870                                                                   | 0.313 / -0.404                                                                   | 0.524 / -0.463                                                                   |

**Table S5.** Crystal data and measurement details for [2d,g]CF<sub>3</sub>SO<sub>3</sub>.

|                                                             | [2d]CF <sub>3</sub> SO <sub>3</sub>                                                            | [2g]CF <sub>3</sub> SO <sub>3</sub>                                              |
|-------------------------------------------------------------|------------------------------------------------------------------------------------------------|----------------------------------------------------------------------------------|
| Formula                                                     | C <sub>24</sub> H <sub>19</sub> F <sub>3</sub> N <sub>2</sub> O <sub>6</sub> Ru <sub>2</sub> S | C <sub>24</sub> H <sub>22</sub> F <sub>3</sub> NO <sub>6</sub> Ru <sub>2</sub> S |
| FW                                                          | 722.61                                                                                         | 711.62                                                                           |
| T, K                                                        | 100(2)                                                                                         | 100(2)                                                                           |
| $\lambda$ , Å                                               | 0.71073                                                                                        | 0.71073                                                                          |
| Crystal system                                              | Monoclinic                                                                                     | Triclinic                                                                        |
| Space group                                                 | <i>P</i> 2 <sub>1</sub> / <i>c</i>                                                             | <i>P</i> $\bar{1}$                                                               |
| <i>a</i> , Å                                                | 9.2614(8)                                                                                      | 9.195(5)                                                                         |
| <i>b</i> , Å                                                | 20.816(4)                                                                                      | 10.654(7)                                                                        |
| <i>c</i> , Å                                                | 12.842(2)                                                                                      | 13.106(7)                                                                        |
| $\alpha$ , °                                                | 90                                                                                             | 103.45(4)                                                                        |
| $\beta$ , °                                                 | 98.530(5)                                                                                      | 90.26(5)                                                                         |
| $\gamma$ , °                                                | 90                                                                                             | 91.24(4)                                                                         |
| Cell Volume, Å <sup>3</sup>                                 | 2448.3(8)                                                                                      | 1248.4(12)                                                                       |
| Z                                                           | 4                                                                                              | 2                                                                                |
| <i>D</i> <sub>c</sub> , g·cm <sup>-3</sup>                  | 1.960                                                                                          | 1.893                                                                            |
| $\mu$ , mm <sup>-1</sup>                                    | 1.387                                                                                          | 1.357                                                                            |
| F(000)                                                      | 1424                                                                                           | 704                                                                              |
| Crystal size, mm                                            | 0.15×0.11×0.06                                                                                 | 0.15×0.13×0.10                                                                   |
| $\theta$ limits, °                                          | 1.878–22.994                                                                                   | 1.966–27.000                                                                     |
| Reflections collected                                       | 16763                                                                                          | 18111                                                                            |
| Independent reflections                                     | 3347 [ <i>R</i> <sub>int</sub> = 0.1183]                                                       | 10701 [ <i>R</i> <sub>int</sub> = 0.0538]                                        |
| Data / restraints / parameters                              | 3347 / 228 / 334                                                                               | 10701 / 21 / 672                                                                 |
| Goodness on fit on F <sup>2</sup>                           | 1.242                                                                                          | 1.084                                                                            |
| <i>R</i> <sub>1</sub> ( <i>I</i> > 2 $\sigma$ ( <i>I</i> )) | 0.1457                                                                                         | 0.0424                                                                           |
| <i>wR</i> <sub>2</sub> (all data)                           | 0.3228                                                                                         | 0.1082                                                                           |
| Largest diff. peak and hole, e Å <sup>-3</sup>              | 2.893 / –2.922                                                                                 | 2.401 / –1.564                                                                   |

**Figure S33.** Comparative view of LC-MS spectra: **A**)  $[2a]CF_3SO_3$  in methanol solution; **B**)  $[2a]CF_3SO_3$  (10  $\mu M$ ) in admixture with GSH (10  $\mu M$ ) in methanol/water solution after 24h incubation. Specific peaks corresponding to GSH and  $[2a]^+$  are highlighted with green and blue rectangles, respectively.

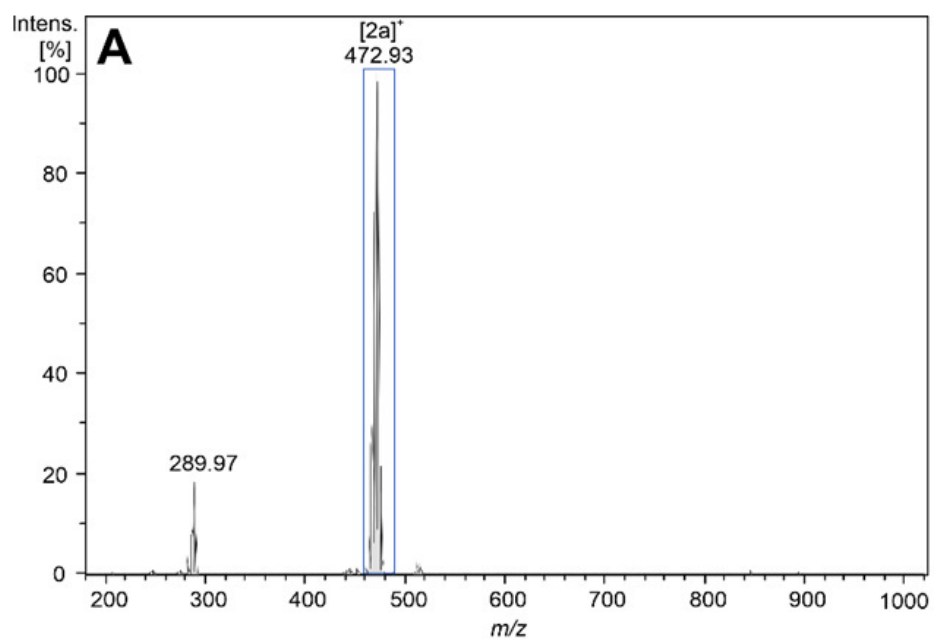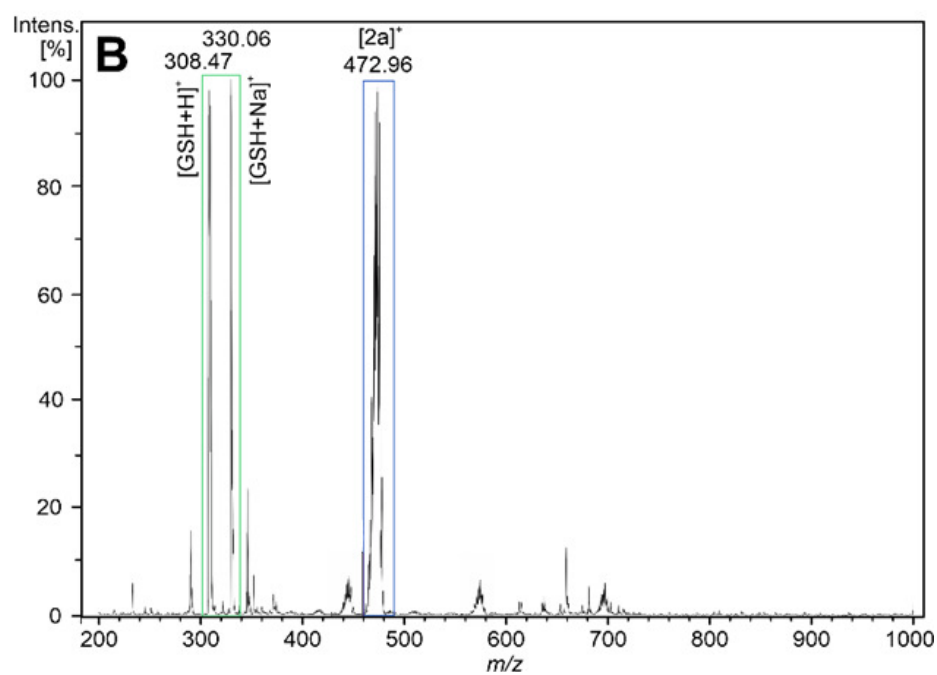

**Figure S34.** Comparative view of LC-MS spectra: **A**) [2d]CF<sub>3</sub>SO<sub>3</sub> in methanol solution; **B**) [2d]CF<sub>3</sub>SO<sub>3</sub> (10 μM) in admixture with GSH (10 μM) in methanol/water solution after 24h incubation. Specific peaks corresponding to GSH and [2d]<sup>+</sup> are highlighted with green and blue rectangles, respectively.

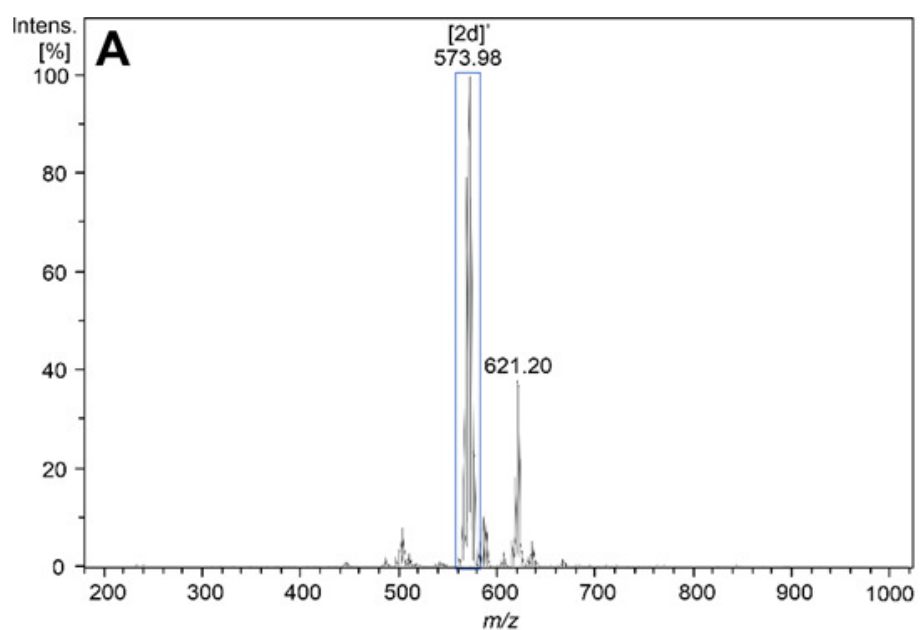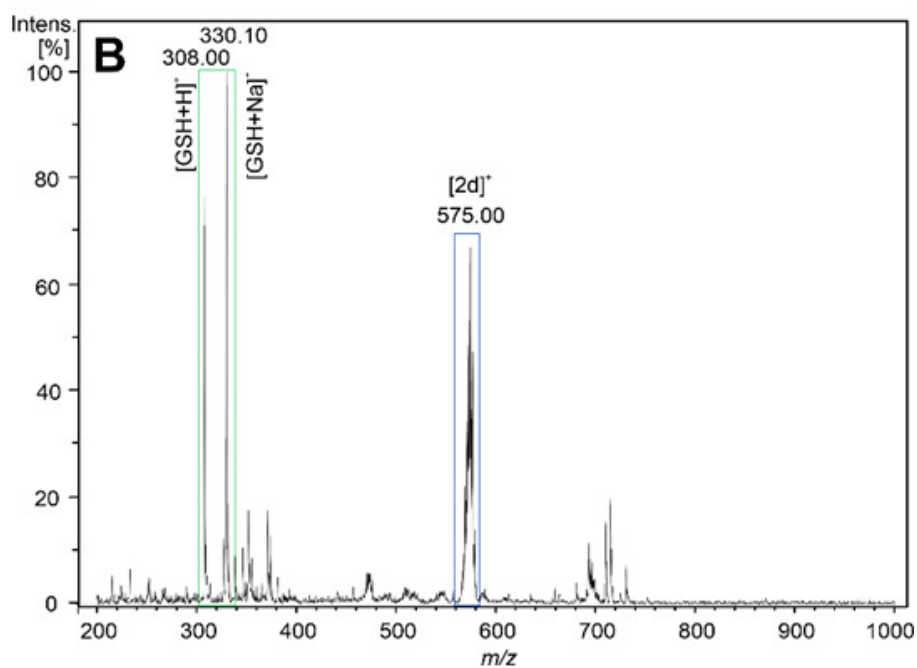

**Figure S35.** MALDI-TOF MS spectra of native bovine serum albumin (BSA, top panel), and mixtures of BSA with **[2a]**CF<sub>3</sub>SO<sub>3</sub> (middle panel), and **[2d]**CF<sub>3</sub>SO<sub>3</sub> (bottom panel) after 48h incubation, suggesting no significant formation of covalent or non-covalent adducts. The indicated values represent the average mass determined from six independent measurements  $\pm$  the standard deviation.

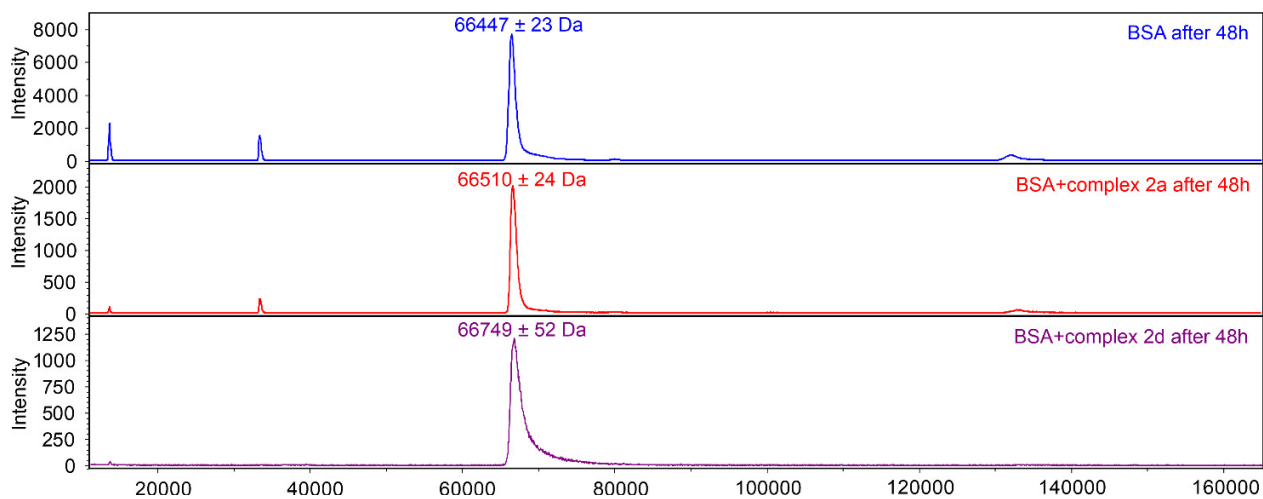



## References

- 1 J. Yin, J. Zhang, C. Cai, G.-J. Deng, H. Gong, Catalyst-Free Transamidation of Aromatic Amines with Formamide Derivatives and Tertiary Amides with Aliphatic Amines, *Org. Lett.* 2019, **21**, 387–392.
- 2 M. A. Mironov, M. I. Tokareva, M. N. Ivantsova, V. S. Mokrushin, Ugi Reaction with Isocyanoindoles, *Russ. J. Org. Chem.* 2004, **40**, 847–853.
- 3 N. M. Doherty, S. A. R. Knox, M. J. Morris, C. P. Casey, G. T. Whiteker, Tetracarbonylbis(h5-cyclopentadienyl)diruthenium, *Inorg. Synth.* 1990, 189-191.
- 4 L. Biancalana, M. De Franco, G. Ciancaleoni, S. Zacchini, G. Pampaloni, V. Gandin, F. Marchetti, Easily Available and Amphiphilic Diiron Cyclopentadienyl Complexes Exhibit In Vitro Anticancer Activity in 2D and 3D Human Cancer Cells via Redox Modulation Triggered by CO Release, *Chem. Eur. J.* 2021, **27**, 10169–10185.
- 5 L. Biancalana, M. Kubeil, S. Schoch, S. Zacchini, F. Marchetti, Switching on Cytotoxicity of Water-Soluble Diiron Organometallics by UV Irradiation, *Inorg. Chem.* 2022, **61**, 7897–7909.
- 6 G. Agonigi, M. Bortoluzzi, F. Marchetti, G. Pampaloni, S. Zacchini, V. Zanotti, Regioselective Nucleophilic Additions to Diiron Carbonyl Complexes Containing a Bridging Aminocarbyne Ligand: A Synthetic, Crystallographic and DFT Study, *Eur. J. Inorg. Chem.* 2018, 960–971.
- 7 G. Albano, L. Busetto, M. Monari, V. Zanotti, Reactions of acetonitrile di-iron m-aminocarbyne complexes; synthesis and structure of  $[\text{Fe}_2(\mu\text{-CNMe}_2)(\text{m-H})(\text{CO})_2(\text{Cp})_2]$ , *J. Organomet. Chem.* **606**, 2000, 163-168.
- 8 G. Agonigi, L. Biancalana, M. G. Lupo, M. Montopoli, N. Ferri, S. Zacchini, F. Binacchi, T. Biver, B. Campanella, G. Pampaloni, V. Zanotti and F. Marchetti, Exploring the Anticancer Potential of Diiron Bis-cyclopentadienyl Complexes with Bridging Hydrocarbyl Ligands: Behavior in Aqueous Media and In Vitro Cytotoxicity, *Organometallics* 2020, **39**, 645-657.
